# Supplementary material
Source: PubMed Central journal article supplement (PMC6341394)
Supplement: supp_RA118.004964_139545_1_supp_237123_psg3n0.pdf [file supp_RA118.004964_139545_1_supp_237123_psg3n0.pdf]

## Supporting information

### Targeted-metabolomics and proteomics identify the toxic form and the associated binders of the anti-proliferative drug AICAR

Delphine C. Douillet<sup>1,2#§</sup>, Benoît Pinson<sup>1,2#</sup>, Johanna Ceschin<sup>1,2</sup>, Hans C. Hürlimann<sup>1,2&</sup>, Christelle Saint-Marc<sup>1,2</sup>, Damien Laporte<sup>1,2</sup>, Stéphane Claverol<sup>3</sup>, Manfred Konrad<sup>4</sup>, Marc Bonneu<sup>3</sup> and Bertrand Daignan-Fornier<sup>1,2\*</sup>

From <sup>1</sup> Université de Bordeaux IBGC UMR 5095 1, rue Camille Saint-Saëns F-33077 Bordeaux France

<sup>2</sup> Centre National de la Recherche Scientifique IBGC UMR 5095 1, rue Camille Saint-Saëns F-33077 Bordeaux France

<sup>3</sup> University of Bordeaux, Bordeaux INP, Plateforme Proteome, Bordeaux, France.

<sup>4</sup> Max-Planck-Institute for Biophysical Chemistry. Am Fassberg 11, D-37077 Goettingen, Germany

Running title: *AICAR monophosphate toxicity*

# Equal contribution

§ Present address: Northwestern University Feinberg School of Medicine. 320 East Superior Street, Chicago, IL 60611 USA

& Present address: Martin-Luther Universität, Genetik, Molekulargenetik, Weinbergweg 10, D-06120 Halle, Germany

\* To whom correspondence should be addressed: Bertrand Daignan-Fornier: Institut de Biochimie et Génétique Cellulaires, CNRS UMR 5095 1 rue C. Saint-Saëns CS 61390 F-33077 Bordeaux France. Tel: +33-556-999-001; Fax: +33-556-999-059; E-mail: [b.daignan-fornier@ibgc.cnrs.fr](mailto:b.daignan-fornier@ibgc.cnrs.fr)

## Supplemental Figures

|                                                                                                                                               |      |
|-----------------------------------------------------------------------------------------------------------------------------------------------|------|
| <b>Figure S1.</b> The mutation rate is not affected by AICAR feeding in yeast                                                                 | p S1 |
| <b>Figure S2.</b> The mitotic recombination rate is not significantly modified by AICAR-feeding in yeast.                                     | p S2 |
| <b>Figure S3.</b> Yeast telomere length is not altered by ZMP accumulation.                                                                   | p S3 |
| <b>Figure S4.</b> ZTP production is not affected in a strain lacking the NDP-kinase gene <i>YNK1</i> .                                        | p S4 |
| <b>Figure S5.</b> Biological Process GO-term enrichment analyses for the AMP-, SZMP- and AICAR-binders identified by affinity chromatography. | p S5 |
| <b>Figure S6.</b> AICAR sensitivity is not altered by deletion of SNF4, the yeast gene for AMPK gamma subunit.                                | p S6 |
| <b>Figure S7.</b> Effect of ZMP-binder gene overexpression on AICAR sensitivity.                                                              | p S7 |
| <b>Figure S8.</b> Nuclear localization of NLS-RFPL25-GFP is not affected by AICAR.                                                            | p S8 |
| <b>Figure S9.</b> AICAR-sensitivity of <i>bre1</i> , <i>swd1</i> and <i>swd3</i> mutants is suppressed by <i>KAP123</i> overexpression.       | p S9 |

## Supplemental Tables

|                                                                                                         |           |
|---------------------------------------------------------------------------------------------------------|-----------|
| <b>Table S1.</b> Lists of proteins bound to the different affinity resins                               | p S10-S15 |
| <u>Part A:</u> List of proteins bound to ZMP-affinity resin                                             | p S10     |
| <u>Part B:</u> List of proteins bound to AMP-affinity resin                                             | p S11-S12 |
| <u>Part C:</u> List of proteins bound to SZMP-affinity resin                                            | p S13-S14 |
| <u>Part D:</u> List of proteins bound to AICAR-affinity resin                                           | p S15     |
| <b>Table S2.</b> List of proteins less abundant in nuclear-enriched fractions in the presence of AICAR  | p S16     |
| <b>Table S3.</b> GO term analyses for the 57 proteins less abundant in the presence of AICAR            | p S17     |
| <b>Table S4:</b> List of the 92 proteins more abundant when <i>KAP123</i> is overexpressed              | p S18-S19 |
| <b>Table S5:</b> GO term analyses for the 92 proteins more abundant when <i>KAP123</i> is overexpressed | p S20     |
| <b>Table S6:</b> Yeast strains used in this study                                                       | p S21     |
| <b>Table S7:</b> Plasmids used in this study                                                            | p S22     |
| <b>Table S8:</b> Mass spectrometry acquisition parameters                                               | p S23     |

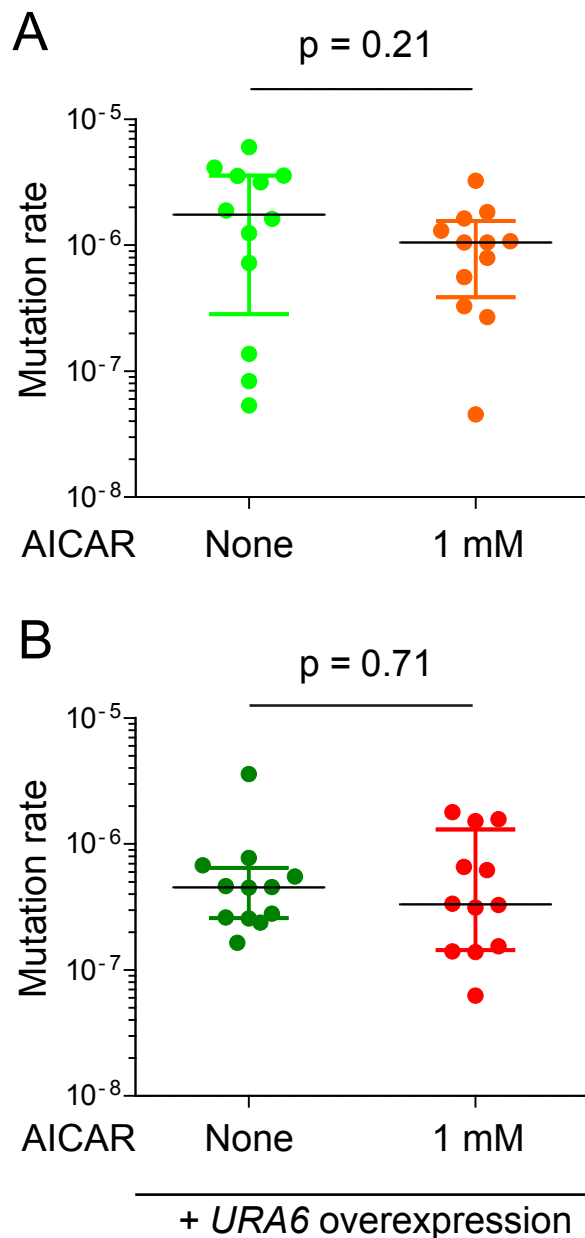

**Figure S1. The mutation rate is not affected by AICAR feeding in yeast.**

Quadruple mutant cells (*ade16 ade17 ade8 his1*, Y6986) were transformed (B) or not (A) with the plasmid allowing *URA6* overexpression (p4919). In each condition, twelve independent cell cultures were inoculated at low cell density (100 cells/ml) in a non-selective medium (SD casaWA) containing or not (none) AICAR (1 mM) and were grown for 72 h at 30°C to reach a cell density of about  $8 \cdot 10^7$  cells/ml. Dilutions of each culture were plated on SD medium supplemented with uracil, adenine, histidine and containing or not canavanin (0.35 mM), a toxic analog of arginine. The mutation rate was determined from the number of canavanin-resistant clones by the method described by Hall *et al* (Hall, B.M., Ma, C.X., Liang, P., and Singh, K.K. (2009). Fluctuation AnaLysis CalculatOR: a Web tool for the determination of mutation rate using Luria–Delbrück fluctuation analysis. *Bioinformatics* 5, 1564–1565). Black and colored bars respectively correspond to the median and the interquartile range.

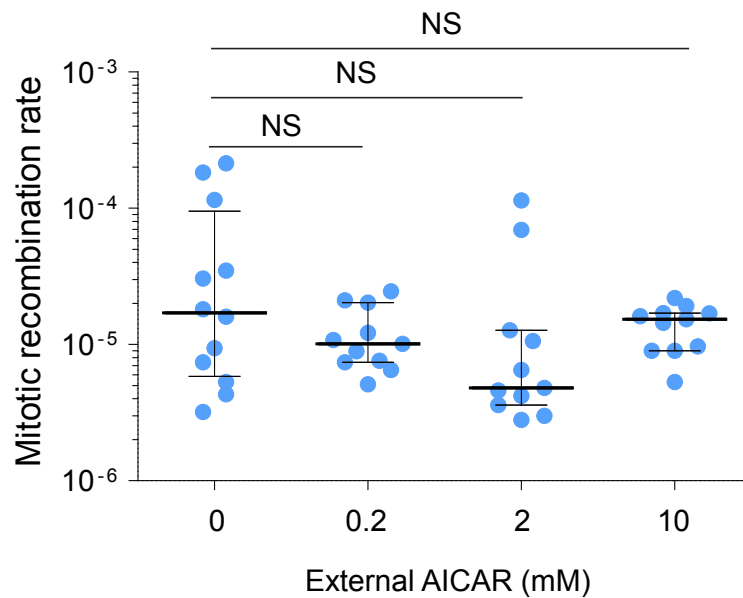

**Figure S2. The mitotic recombination rate is not significantly modified by AICAR-feeding in yeast.**

The pRS316-TINV plasmid carrying two inverted and partial *LEU2* sequences was used to estimate the effect of AICAR feeding on mitotic recombination rate of an *ade16 ade17 ade8 his1* strain (Y8480), as described (González-Barrera S, García-Rubio M and Aguilera A. Genetics. (2002) 162(2):603-14). Mitotic recombination rate were measured on twelve independent cultures for each condition and statistical analysis was performed using a Mann-Whitney test. NS: non-significant  $p > 0.05$ . Bars correspond to the median and the interquartile range.

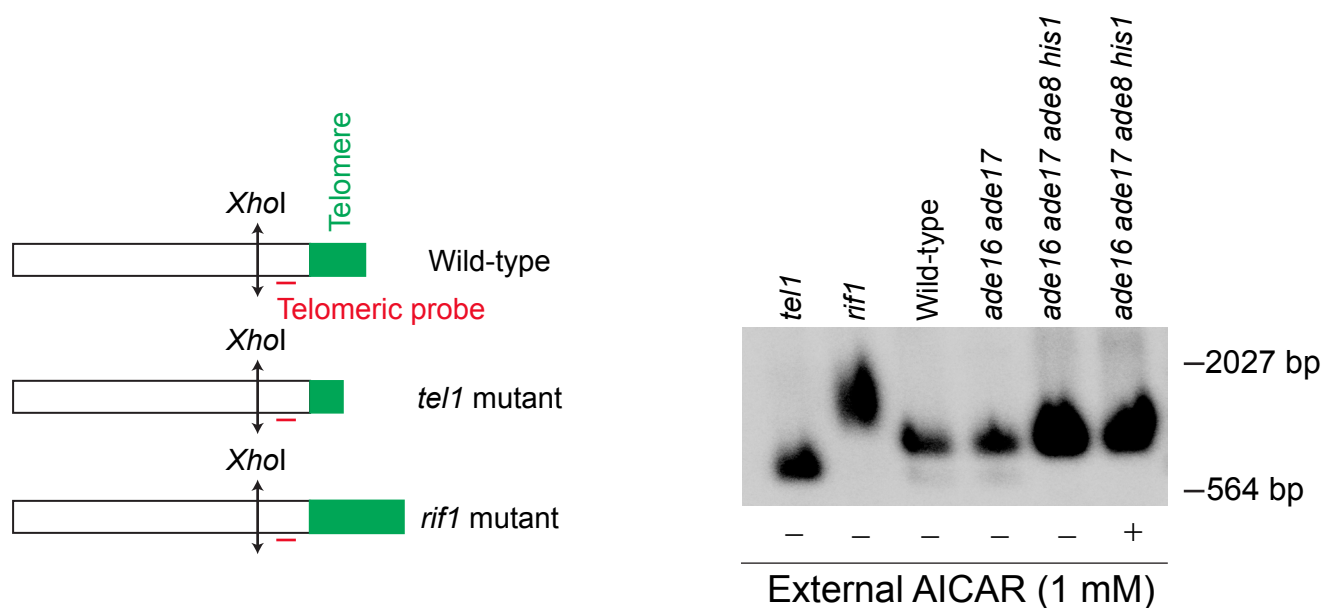

**Figure S3. Yeast telomere length is not altered by ZMP accumulation.**

Telomere length was estimated by Southern blotting after *XhoI* digestion of genomic DNA extracted from yeast cells accumulating ZMP by two different means, either endogenously from the purine pathway (*ade16 ade17*; Y1162) or exogenously by AICAR feeding (+; 1 mM) of the *ade8 ade16 ade17 his1* strain (Y2950). The radiolabeled telomeric probe was obtained by PCR on genomic DNA with oligonucleotides 5' CAGTTTAGCAGGCATCATCG3' and 5' -CGAGAACTTCAA-CGTTTGCC-3'. Mutants already shown to have a reduced (*tel1*) or an increased (*rif1*) telomere length were used as controls.

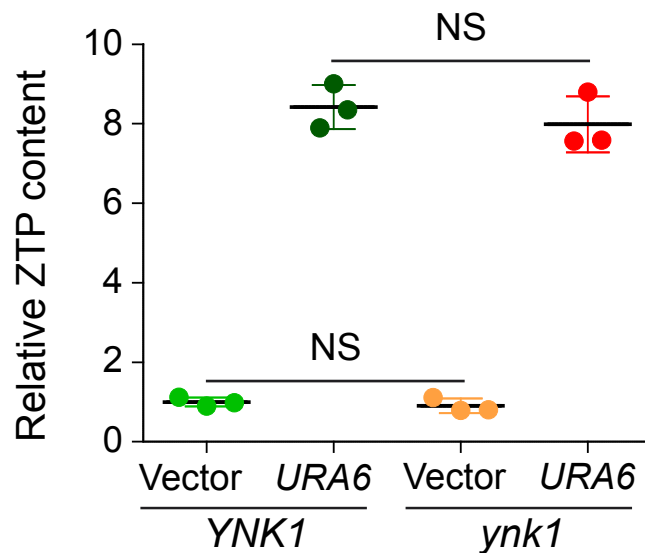

**Figure S4. ZTP production is not affected in a strain lacking the NDP-kinase gene *YNK1*.**

ZTP intracellular relative content was determined by High Performance Ion Chromatography on *ade16 ade17* AICAR-accumulating cells either *ynk1* (Y9715; orange and red dots) or *YNK1* (Y1162; light and dark green dots). Cells were transformed with a plasmid allowing *URA6* overexpression (p4919) or with the control empty vector. Metabolite extractions were done on transformants exponentially grown for 24 h in SD<sub>case</sub>WA medium. Analyses were done on three independent metabolite extractions and standard deviation is presented. Statistics correspond to a Welch's t-test: NS: Non-significant  $p > 0.05$ . Black lines correspond to the mean. Relative ZTP content was set at 1 for the content measured in the *ade16 ade17 YNK1* strain containing the empty vector (light green dots).

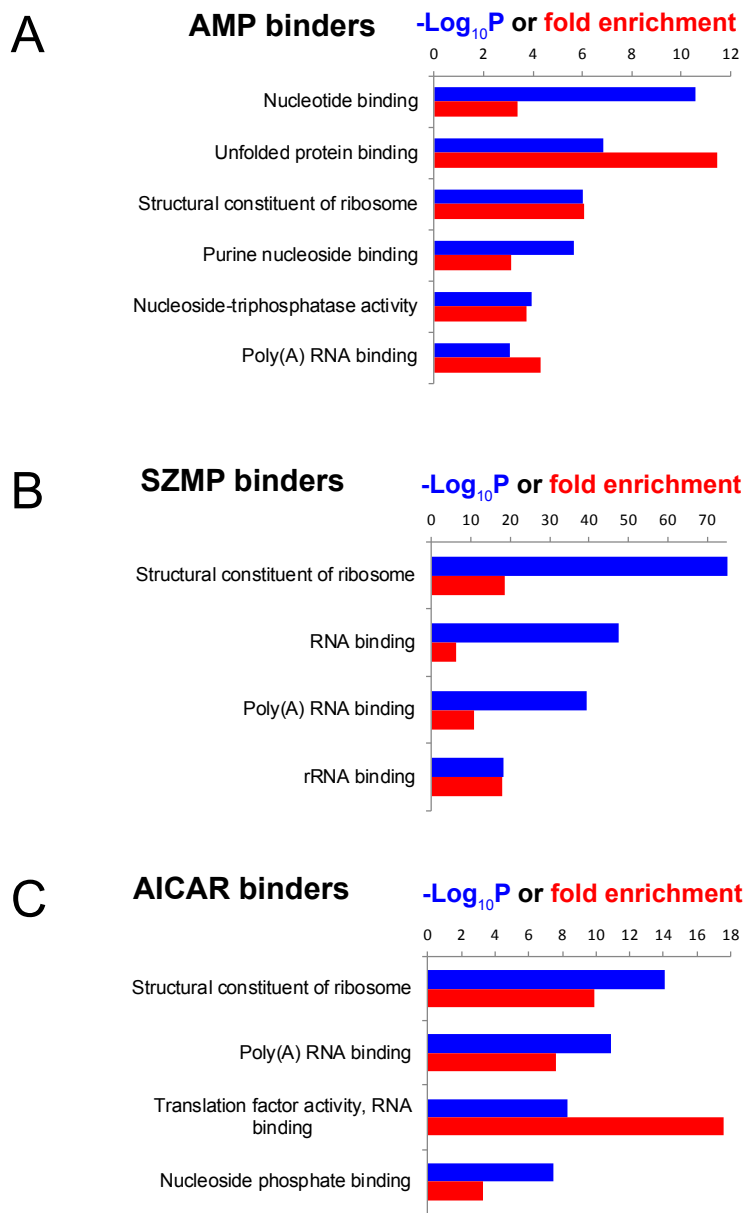

**Figure S5. Biological Process GO-term enrichment analyses for the AMP- (A), SZMP- (B) and AICAR-binders (C) identified by affinity chromatography.** The complete list of proteins identified in each case is presented in Table S1 part B-D. GO-term analyses were performed using the Gene Ontology Consortium web site (<http://www.geneontology.org/>).

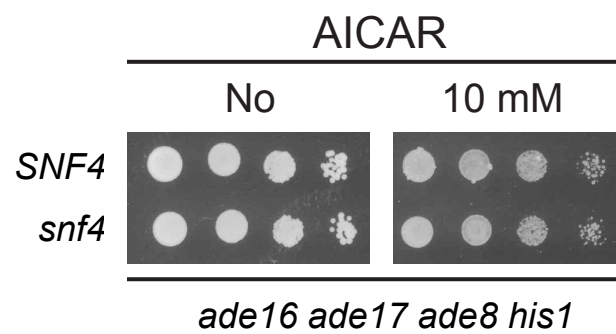

**Figure S6. AICAR sensitivity is not altered by deletion of *SNF4*, the yeast gene for AMPK gamma subunit.**

Yeast cells (Y8480 (*SNF4*) and Y10867 (*snf4*)) were serially diluted and spotted on SDcasaWA medium containing, or lacking, AICAR. Plates were imaged after 2 days at 30°C.



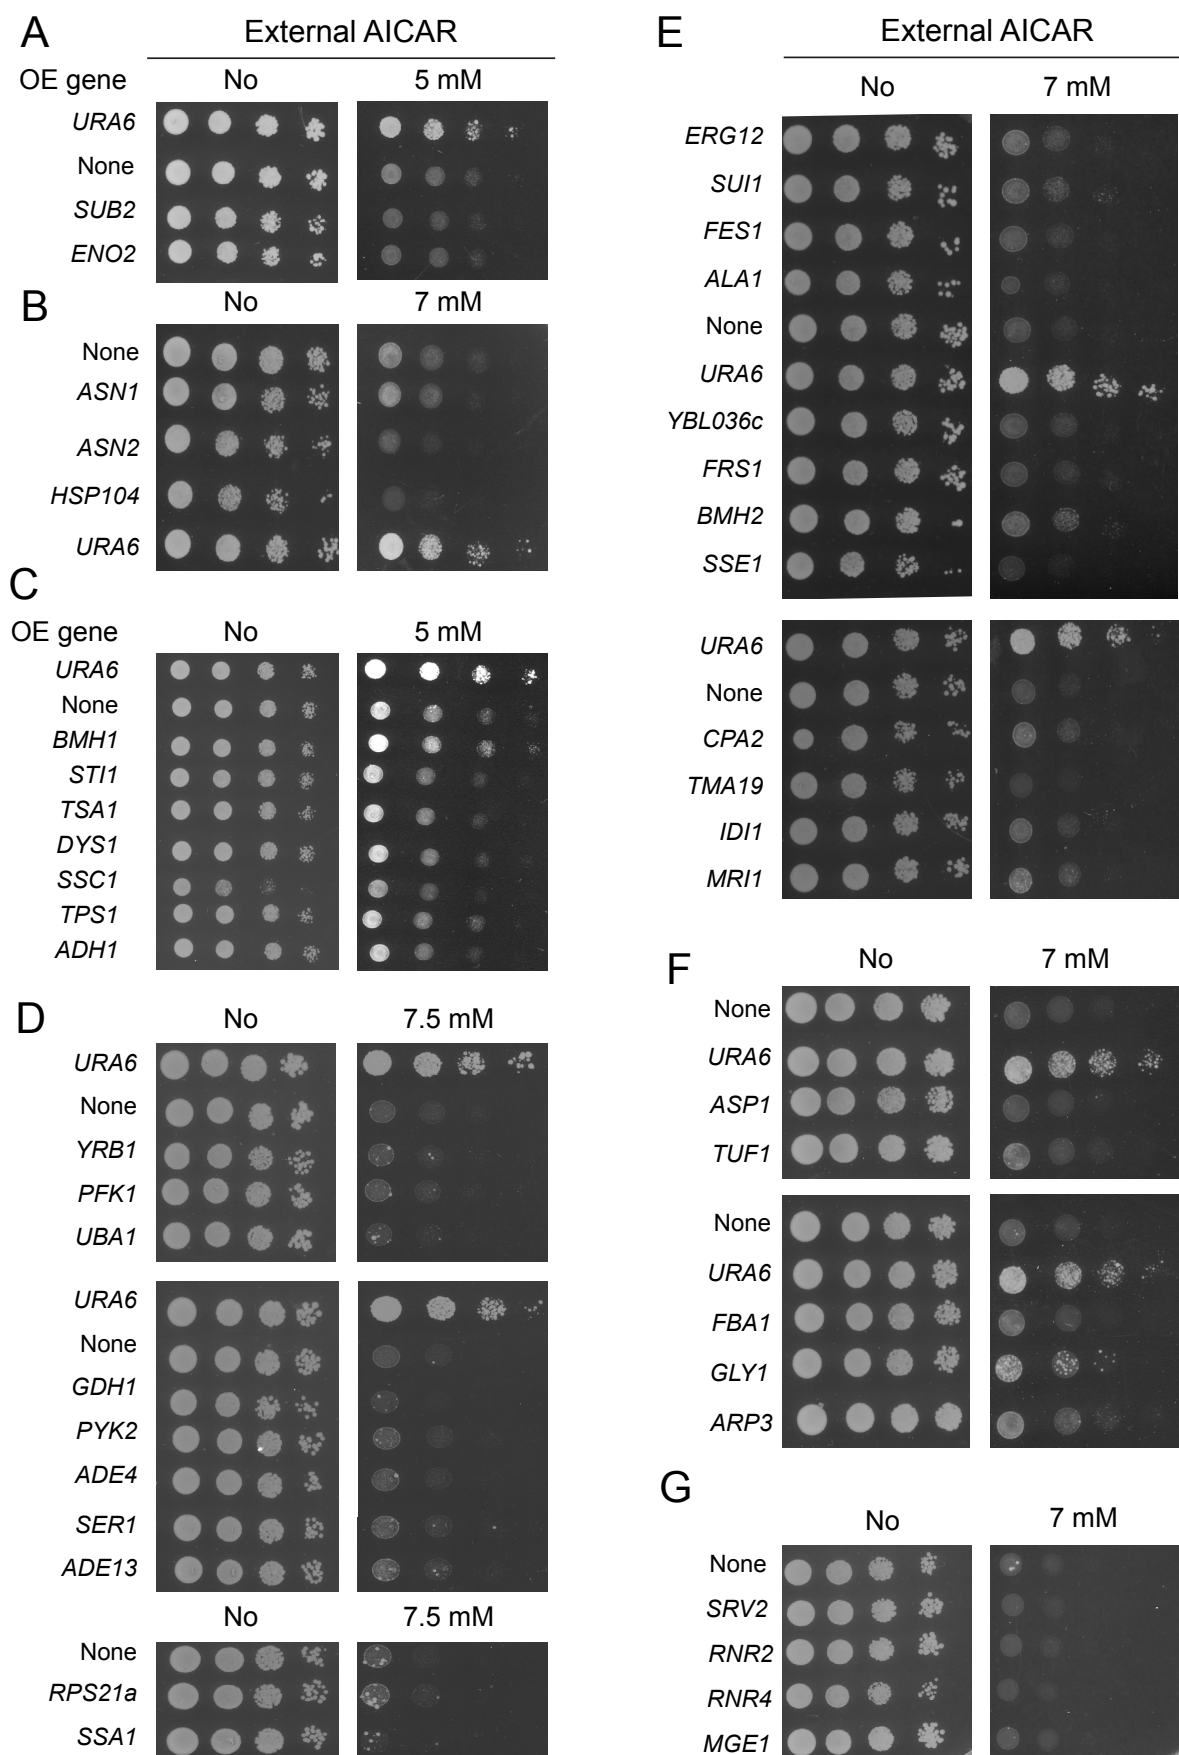

**Figure S7. Effect of ZMP-binder gene overexpression on AICAR sensitivity.**

Cells (*ade16 ade17 ade8 his1* (Y2950; A-B) or *ade3 ade16 ade17 ade8 his1* (Y8908; C)) were transformed with plasmids allowing overexpression of selected ZMP binder genes (boxed in yellow in Fig. 4) or by the cognate empty vector (None). Transformants were serially diluted and spotted on SC-Leu (A-B) or SDcasaWA medium (C-G) containing or not AICAR. Plates were imaged after 2 days at 30°C (A-B) or 37°C (C-G).

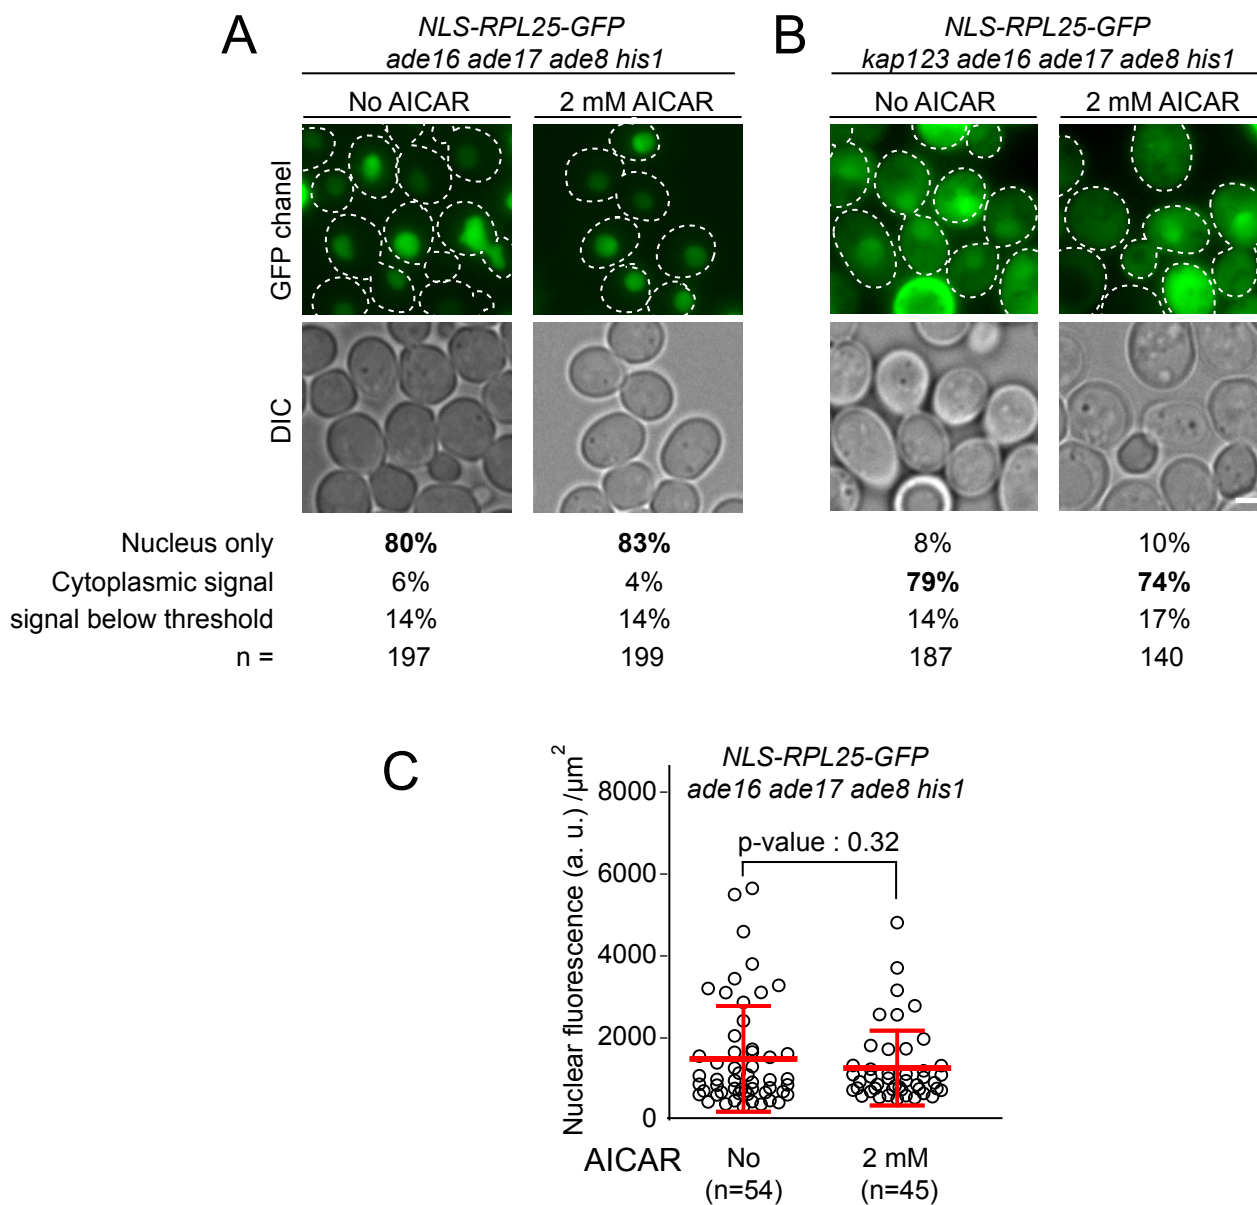

**Figure S8. Nuclear localization of NLS-RFPL25-GFP is not affected by AICAR.**

*A-B*, AICAR accumulation does not influence Rpl25 localization. *A*, NLS-Rpl25 mainly localizes in the nucleus, irrespective of AICAR accumulation. Cells (*ade8 ade16 ade17 his1*; Y8480) expressing NLS-Rpl25-GFP were incubated 2 h  $\pm$  2 mM AICAR at 30°C and imaged. *B*, NLS-Rpl25 mainly localizes in the cytoplasm in *kap123* deleted cells, irrespective of AICAR accumulation. Cells (*kap123 ade8 ade16 ade17 his1*; Y9623) expressing NLS-Rpl25-GFP were incubated 2 h  $\pm$  2 mM AICAR at 30°C and imaged. In *A-B*, a threshold 25% higher than the mean fluorescence field was applied to determine Rpl25 localization (N=3). Representative pictures are shown. White dashed lines: cells. Bar size is 2  $\mu\text{m}$ . *C*, AICAR accumulation does not influence Rpl25 nuclear fluorescence intensity. Analysis was carried out on cells as described in (*A*). Using ImageJ software, 11 slides of a Z-stack were summed and projected. Fluorescence background (i.e field without cells) was measured and subtracted from the pictures. Then, circles containing Rpl25-GFP signal were drawn around the nucleus (Int), and the nuclear fluorescence intensity was calculated as follows:  $\text{nf} = (\text{Int} / \text{circle area})$ . Importantly, nucleus areas do not change with or without AICAR. P-value was determined with a Welch's t-Test and mean and SD are indicated (red lines). Cells were observed in a fully automated Zeiss 200M inverted microscope (Carl Zeiss, Thornwood, NY) equipped with a MS-2000 stage (Applied Scientific Instrumentation, Eugene, OR), a Lambda LS 175 Watt xenon light source (Sutter, Novato, CA), a 100X 1.4NA Plan-Apochromat objective, and a 5 position filter turret. For GFP imaging, we used a FITC filter (Excitation: HQ487/25 – Emission: HQ535/40 – BS: Q5051p).

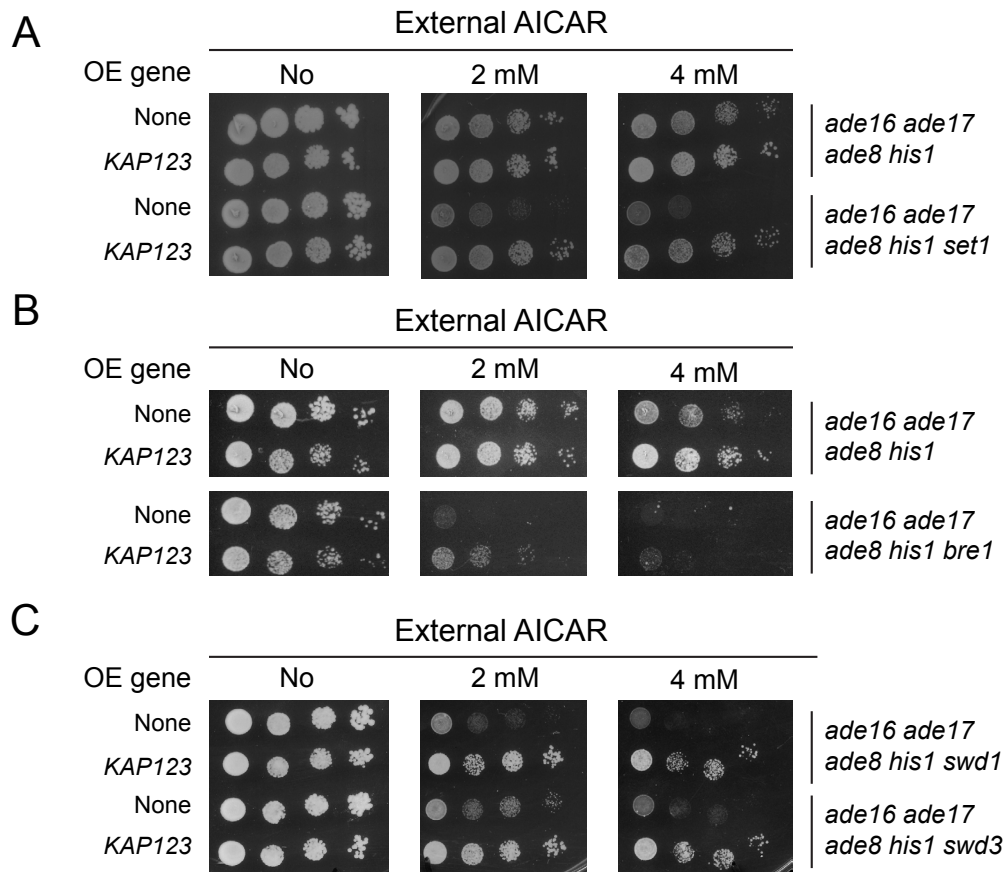

**Figure S9. AICAR sensitivity of *bre1*, *swd1* and *swd3* mutants is suppressed by *KAP123* overexpression.** Yeast cells (*ade8 ade16 ade17 his1* (Y2950), *ade8 ade16 ade17 his1 set1* (Y9168), *ade8 ade16 ade17 his1 bre1* (Y9082), *ade8 ade16 ade17 his1 swd1* (Y9479) and *ade8 ade16 ade17 his1 swd3* (Y9480)) were transformed by the plasmid allowing overexpression of *KAP123* (p4983) or by the cognate empty vector (YepLac195; None). Transformants were serially diluted and spotted on SDcasaWA medium containing, or lacking, AICAR. Plates were imaged after 2 days at 37°C.

**Table S1 part A: List of the 74 proteins bound to ZMP-affinity resin at least four times on 6 independent experiments**

| ORF name | Protein name   | Fold found on ZMP-resin (6 columns) | Protein function                                                                                                                                                                                                                                   |
|----------|----------------|-------------------------------------|----------------------------------------------------------------------------------------------------------------------------------------------------------------------------------------------------------------------------------------------------|
| YCR088W  | <b>Abp1</b>    | 6                                   | Actin-binding protein of the cortical actin cytoskeleton, important for activation of the Arp2/3 complex that plays a key role actin in cytoskeleton organization                                                                                  |
| YOR336C  | <b>Ala1</b>    | 6                                   | Cytoplasmic and mitochondrial alanyl-tRNA synthetase, required for protein synthesis; point mutation (cdc64-1 allele) causes cell cycle arrest at G1; lethality of null mutation is functionally complemented by human homolog                     |
| YOR133W  | <b>Ef1</b>     | 6                                   | Elongation factor 2 (EF-2), also encoded by EFT2; catalyzes ribosomal translocation during protein synthesis; contains diphthamide, the unique posttranslationally modified histidine residue specifically ADP-ribosylated by diphtheria toxin     |
| YEL046C  | <b>Gly1</b>    | 6                                   | Threonine aldolase, catalyzes the cleavage of L-allo-threonine and L-threonine to glycine; involved in glycine biosynthesis                                                                                                                        |
| YMR118W  | <b>Hsc82</b>   | 6                                   | Cytoplasmic chaperone of the Hsp90 family, redundant in function and nearly identical with Hsp82p, and together they are essential; expressed constitutively at 10-fold higher basal levels than HSP82 and induced 2-3 fold by heat shock          |
| YGR240C  | <b>PIK1</b>    | 6                                   | Alpha subunit of heteroooligomeric phosphofructokinase involved in glycolysis, indispensable for anaerobic growth, activated by fructose-2,6-bisphosphate and AMP, mutation inhibits glucose induction of cell cycle-related genes                 |
| YMR205C  | <b>PIK2</b>    | 6                                   | Beta subunit of heteroooligomeric phosphofructokinase involved in glycolysis, indispensable for anaerobic growth, activated by fructose-2,6-bisphosphate and AMP, mutation inhibits glucose induction of cell cycle-related genes                  |
| YGL037C  | <b>Pnc1</b>    | 6                                   | Nicotinamide that converts nicotinamide to nicotinic acid as part of the NAD(+) salvage pathway, required for life span extension by calorie restriction; PNC1 expression responds to all known stimuli that extend replicative life span          |
| YDR023W  | <b>Ses1</b>    | 6                                   | Cytosolic seryl-tRNA synthetase, class II aminoacyl-tRNA synthetase that aminoacylates tRNA(Ser), displays tRNA-dependent amino acid recognition which enhances discrimination of the serine substrate, interacts with peroxin Pex21p              |
| YAL005C  | <b>Ssa1</b>    | 6                                   | ATPase involved in protein folding and nuclear localization signal (NLS)-directed nuclear transport; member of heat shock protein 70 (HSP70) family; forms a chaperone complex with Ydj1p; localized to the nucleus, cytoplasm, and cell wall      |
| YLL024C  | <b>Ssa2</b>    | 6                                   | ATP binding protein involved in protein folding and vacuolar import of proteins; member of heat shock protein 70 (HSP70) family; associated with the chaperonin-containing T-complex; present in the cytoplasm, vacuolar membrane and cell wall    |
| YPL106C  | <b>Sse1</b>    | 6                                   | ATPase that is a component of the heat shock protein Hsp90 chaperone complex; binds unfolded proteins; member of the heat shock protein 70 (HSP70) family; localized to the cytoplasm                                                              |
| YOR027W  | <b>Sti1</b>    | 6                                   | Hsp90 cochaperone, interacts with the Ssa group of the cytosolic Hsp70 chaperones; activates the ATPase activity of Ssa1p; homolog of mammalian Hop protein                                                                                        |
| YPR080W  | <b>TeF1</b>    | 6                                   | Translational elongation factor EF-1 alpha; also encoded by TEF2; functions in the binding reaction of aminoacyl-tRNA (AA-tRNA) to ribosomes; may also have a role in tRNA re-export from the nucleus                                              |
| YKL056C  | <b>Tma19</b>   | 6                                   | Protein that associates with ribosomes; homolog of translationally controlled tumor protein; green fluorescent protein (GFP)-fusion protein localizes to the cytoplasm and relocates to the mitochondrial outer surface upon oxidative stress      |
| YML028W  | <b>Tsa1</b>    | 6                                   | Thioredoxin peroxidase, acts as both a ribosome-associated and free cytoplasmic antioxidant; self-associates to form a high-molecular weight chaperone complex under oxidative stress; deletion results in mutator phenotype                       |
| YKL210W  | <b>Uba1</b>    | 6                                   | Ubiquitin activating enzyme (E1), involved in ubiquitin-mediated protein degradation and essential for viability                                                                                                                                   |
| YBR127C  | <b>Vma2</b>    | 6                                   | Subunit B of the eight-subunit V1 peripheral membrane domain of the vacuolar H+-ATPase (V-ATPase), an electrogenic proton pump found throughout the endomembrane system; contains nucleotide binding sites; also detected in the cytoplasm         |
| YLF039C  | <b>Act1</b>    | 5                                   | Actin, structural protein involved in cell polarization, endocytosis, and other cytoskeletal functions                                                                                                                                             |
| YLR359W  | <b>Ade13</b>   | 5                                   | Adenylosuccinate lyase, catalyzes two steps in the 'de novo' purine nucleotide biosynthetic pathway; expression is repressed by adenine and activated by Bas1p and Pho2p; mutations in human ortholog ADSL cause adenylosuccinate deficiency       |
| YOL086C  | <b>Adh1</b>    | 5                                   | Alcohol dehydrogenase, fermentative isozyme active as homo- or heterotetramers; required for the reduction of acetaldehyde to ethanol, the last step in the glycolytic pathway                                                                     |
| YPL061W  | <b>Ald6</b>    | 5                                   | Cytosolic aldehyde dehydrogenase, activated by Mg2+ and utilizes NADP+ as the preferred coenzyme; required for conversion of acetaldehyde to acetate; constitutively expressed; localizes to the mitochondrial outer surface upon oxidative stress |
| YPR145W  | <b>Asn1</b>    | 5                                   | Asparagine synthetase, isozyme of Asn2p; catalyzes the synthesis of L-asparagine from L-aspartate in the asparagine biosynthetic pathway                                                                                                           |
| YGR124W  | <b>Asn2</b>    | 5                                   | Asparagine synthetase, isozyme of Asn1p; catalyzes the synthesis of L-asparagine from L-aspartate in the asparagine biosynthetic pathway                                                                                                           |
| YDR321W  | <b>Asp1</b>    | 5                                   | Cytosolic L-asparaginase, involved in asparagine catabolism                                                                                                                                                                                        |
| YER177W  | <b>Bmh1</b>    | 5                                   | 14-3-3 protein, major isoform; controls proteome at post-transcriptional level, binds proteins and DNA, involved in regulation of many processes including exocytosis, vesicle transport, Ras/MAPK signaling, and rapamycin-sensitive signaling    |
| YHR068W  | <b>Dys1</b>    | 5                                   | Deoxyhypusine synthase, catalyzes formation of deoxyhypusine, the first step in hypusine biosynthesis; triggers posttranslational hypusination of translation elongation factor eIF-5A and regulates its intracellular levels; tetrameric          |
| YMR208W  | <b>Erg12</b>   | 5                                   | Mevalonate kinase, acts in the biosynthesis of isoprenoids and sterols, including ergosterol, from mevalonate                                                                                                                                      |
| YKL060C  | <b>Fba1</b>    | 5                                   | Fructose 1,6-bisphosphate aldolase; required for glycolysis and gluconeogenesis; catalyzes conversion of fructose 1,6 bisphosphate to glyceraldehyde-3-P and dihydroxyacetone-P                                                                    |
| YOR375C  | <b>Gdh1</b>    | 5                                   | NAD(P)+-dependent glutamate dehydrogenase, synthesizes glutamate from ammonia and alpha-ketoglutarate; rate of alpha-ketoglutarate utilization differs from Gdh3p; expression regulated by nitrogen and carbon sources                             |
| YPL240C  | <b>Hsp82</b>   | 5                                   | Hsp90 chaperone required for pheromone signaling and negative regulation of Hsf1p; docks with Tom70p for mitochondrial preprotein delivery; promotes telomerase DNA binding and nucleotide addition; interacts with Cns1p, Cpr6p, Cpr7p, Sti1p     |
| YJR070C  | <b>Lia1</b>    | 5                                   | Deoxyhypusine hydroxylase, a HEAT-repeat containing metalloenzyme that catalyzes hypusine formation; binds to and is required for the modification of Hyp2p (eIF5A); complements S. pombe mmd1 mutants defective in mitochondrial positioning      |
| YPR118W  | <b>Mri1</b>    | 5                                   | 5-methylthioribose-1-phosphate isomerase; catalyzes the isomerization of 5-methylthioribose-1-phosphate to 5-methylthioribose-5-phosphate in the methionine salvage pathway                                                                        |
| YER165W  | <b>Pab1</b>    | 5                                   | Poly(A) binding protein, part of the 3'-end RNA-processing complex, mediates interactions between the 5' cap structure and the 3' mRNA poly(A) tail, involved in control of poly(A) tail length, interacts with translation factor eIF-4G          |
| YLR044C  | <b>Pdc1</b>    | 5                                   | Major of three pyruvate decarboxylase isozymes, key enzyme in alcoholic fermentation, decarboxylates pyruvate to acetaldehyde; subject to glucose-, ethanol-, and autoregulation; involved in amino acid catabolism                                |
| YBR218C  | <b>Pyc2</b>    | 5                                   | Pyruvate carboxylase isoform, cytoplasmic enzyme that converts pyruvate to oxaloacetate; highly similar to isoform Pyc1p but differentially regulated; mutations in the human homolog are associated with lactic acidosis                          |
| YOR184W  | <b>Ser1</b>    | 5                                   | 3-phosphoserine aminotransferase, catalyzes the formation of phosphoserine from 3-phosphohydroxypropylate, required for serine and glycine biosynthesis; regulated by the general control of amino acid biosynthesis mediated by Gcn4p             |
| YJR045C  | <b>Ssc1</b>    | 5                                   | Hsp70 family ATPase, constituent of the import motor component of the Translocase of the Inner Mitochondrial membrane (TIM23 complex); involved in protein translocation and folding; subunit of Scel endonuclease                                 |
| YNL244C  | <b>Sui1</b>    | 5                                   | Translation initiation factor eIF1; component of a complex involved in recognition of the initiator codon; modulates translation accuracy at the initiation phase                                                                                  |
| YKR059W  | <b>Tif1</b>    | 5                                   | Translation initiation factor eIF4A, identical to Tif2p; DEA(D/H)-box RNA helicase that couples ATPase activity to RNA binding and unwinding; forms a dumbbell structure of two compact domains connected by a linker; interacts with eIF4G        |
| YPR163C  | <b>Tif3</b>    | 5                                   | Translation initiation factor eIF-4B, has RNA annealing activity; contains an RNA recognition motif and binds to single-stranded RNA                                                                                                               |
| YBR126C  | <b>Tps1</b>    | 5                                   | Synthase subunit of trehalose-6-phosphate synthase/phosphatase complex, which synthesizes the storage carbohydrate trehalose; also found in a monomeric form; expression is induced by the stress response and repressed by the Ras-cAMP pathway   |
| YOR187W  | <b>Tuf1</b>    | 5                                   | Mitochondrial translation elongation factor Tu; comprises both GTPase and guanine nucleotide exchange factor activities, while these activities are found in separate proteins in S. pombe and humans                                              |
| YGR094W  | <b>Vas1</b>    | 5                                   | Mitochondrial and cytoplasmic valyl-tRNA synthetase                                                                                                                                                                                                |
| YMR300C  | <b>Ade4</b>    | 4                                   | Phosphoribosylpyrophosphate amidotransferase (PRPPAT; amidophosphoribosyltransferase), catalyzes first step of the 'de novo' purine nucleotide biosynthetic pathway                                                                                |
| YJR065C  | <b>Arp3</b>    | 4                                   | Essential component of the Arp2/3 complex; Arp2/3 is a highly conserved actin nucleation center required for the motility and integrity of actin patches; involved in endocytosis and membrane growth and polarity                                 |
| YGR262C  | <b>Bgl2</b>    | 4                                   | Endo-beta-1,3-glucanase; major protein of the cell wall, involved in cell wall maintenance; involved in incorporation of newly synthesized mannoprotein molecules into the cell wall                                                               |
| YDR099W  | <b>Bmh2</b>    | 4                                   | 14-3-3 protein, minor isoform; controls proteome at post-transcriptional level, binds proteins and DNA, involved in regulation of many processes including exocytosis, vesicle transport, Ras/MAPK signaling, and rapamycin-sensitive signaling    |
| YAL038W  | <b>Cdc19</b>   | 4                                   | Pyruvate kinase, functions as a homotetramer in glycolysis to convert phosphoenolpyruvate to pyruvate, the input for aerobic (TCA cycle) or anaerobic (glucose fermentation) respiration                                                           |
| YJR109C  | <b>Cpa2</b>    | 4                                   | Large subunit of carbamoyl phosphate synthetase, which catalyzes a step in the synthesis of citrulline, an arginine precursor                                                                                                                      |
| YAL003W  | <b>Efb1</b>    | 4                                   | Translation elongation factor 1 beta; stimulates nucleotide exchange to regenerate EF-1 alpha-GTP for the next elongation cycle; part of the EF-1 complex, which facilitates binding of aminoacyl-tRNA to the ribosomal A site                     |
| YHR174W  | <b>Eno2</b>    | 4                                   | Enolase II, a phosphopyruvate hydratase that catalyzes the conversion of 2-phosphoglycerate to phosphoenolpyruvate during glycolysis and the reverse reaction during gluconeogenesis; expression is induced in response to glucose                 |
| YDR518W  | <b>Eug1</b>    | 4                                   | Protein disulfide isomerase of the endoplasmic reticulum lumen; EUG1 has a paralogue, PDI1, that arose from the whole genome duplication; function overlaps with that of Pdi1p; may interact with nascent polypeptides in the ER                   |
| YBR101C  | <b>Fes1</b>    | 4                                   | Hsp70 (Ssa1p) nucleotide exchange factor, cytosolic homolog of Sti1p, which is the nucleotide exchange factor for Ibp1 (Kar2p) in the endoplasmic reticulum                                                                                        |
| YLR060W  | <b>Frs1</b>    | 4                                   | Beta subunit of cytoplasmic phenylalanyl-tRNA synthetase; forms a tetramer with Frs2p to generate active enzyme; able to hydrolyze mis-aminoacylated tRNA-Phe, which could contribute to translational quality control                             |
| YER133W  | <b>Glc7</b>    | 4                                   | Type 1 serine/threonine protein phosphatase catalytic subunit, involved in many processes (eg. glycogen metabolism, sporulation, mitosis); accumulates at mating projections with interaction with Afr1p; interacts with many regulatory subunits  |
| YLL026W  | <b>Hsp104</b>  | 4                                   | Disaggregase; heat shock protein that cooperates with Ydj1p (Hsp40) and Ssa1p (Hsp70) to refold and reactivate previously denatured, aggregated proteins; responsive to stresses including: heat, ethanol, and sodium arsenite                     |
| YEL034W  | <b>Hyp2</b>    | 4                                   | Translation elongation factor eIF-5A, previously thought to function in translation initiation; similar to and functionally redundant with Anb1p; structural homolog of bacterial EF-F; undergoes an essential hypusination modification           |
| YPL117C  | <b>Idi1</b>    | 4                                   | Isopentenyl diphosphate:dimethylallyl diphosphate isomerase (IPP isomerase), catalyzes an essential activation step in the isoprenoid biosynthetic pathway; required for viability                                                                 |
| YER110C  | <b>Kap123</b>  | 4                                   | Karyopherin beta, mediates nuclear import of ribosomal proteins prior to assembly into ribosomes and import of histones H3 and H4; localizes to the nuclear pore, nucleus, and cytoplasm; exhibits genetic interactions with RAI1                  |
| YOR232W  | <b>Mge1</b>    | 4                                   | Mitochondrial matrix cochaperone, acts as a nucleotide release factor for Ssc1p in protein translocation and folding; also acts as cochaperone for Ssq1p in folding of Fe-S cluster proteins; homolog of E. coli CrpE                              |
| YLL026W  | <b>Rnr2</b>    | 4                                   | Ribonucleotide-diphosphate reductase (RNR), small subunit; the RNR complex catalyzes the rate-limiting step in dNTP synthesis and is regulated by DNA replication and DNA damage checkpoint pathways via localization of the small subunits        |
| YGR180C  | <b>Rnr4</b>    | 4                                   | Ribonucleotide-diphosphate reductase (RNR) small subunit; the RNR complex catalyzes the rate-limiting step in dNTP synthesis and is regulated by DNA replication and DNA damage checkpoint pathways via localization of the small subunits         |
| YOL039W  | <b>Rpp2a</b>   | 4                                   | Ribosomal protein P2 alpha, a component of the ribosomal stalk, which is involved in the interaction between translational elongation factors and the ribosome; regulates the accumulation of P1 (Rpp1Ap and Rpp1Bp) in the cytoplasm              |
| YDR382W  | <b>Rpp2b</b>   | 4                                   | Ribosomal protein P2 beta, a component of the ribosomal stalk, which is involved in the interaction between translational elongation factors and the ribosome; regulates the accumulation of P1 (Rpp1Ap and Rpp1Bp) in the cytoplasm               |
| YGR214W  | <b>Rps0a</b>   | 4                                   | Protein component of the small (40S) ribosomal subunit, nearly identical to Rps0Bp; required for maturation of 18S rRNA along with Rps0Bp; deletion of either RPS0 gene reduces growth rate, deletion of both genes is lethal                      |
| YKR057W  | <b>Rps21a</b>  | 4                                   | Protein component of the small (40S) ribosomal subunit; nearly identical to Rps21Bp and has similarity to rat S21 ribosomal protein                                                                                                                |
| YBL059W  | <b>Shp1</b>    | 4                                   | UBX domain-containing substrate adaptor for Cdc48p; ubiquitin regulatory X domain-containing protein that acts as a substrate recruiting cofactor for Cdc48p; positively regulates Glc7p PPase activity                                            |
| YNL138W  | <b>Srv2</b>    | 4                                   | CAP (cyclase-associated protein); N-terminus binds adenylate cyclase and facilitates activation by RAS; N-terminus forms novel hexameric star-shaped shurken structures that directly catalyze cofilin-mediated severing of actin filaments        |
| YNL209W  | <b>Ssb2</b>    | 4                                   | Cytoplasmic ATPase that is a ribosome-associated molecular chaperone, functions with J-protein partner Zuo1p; may be involved in the folding of newly-synthesized polypeptide chains; member of the HSP70 family; homolog of SSB1                  |
| YDL084W  | <b>Sub2</b>    | 4                                   | Component of the TREX complex required for nuclear mRNA export; member of the DEAD-box RNA helicase superfamily and is involved in early and late steps of spliceosome assembly; homolog of the human splicing factor hUAP56                       |
| YDL185W  | <b>Vma1</b>    | 4                                   | Subunit A of the eight-subunit V1 peripheral membrane domain of the vacuolar H+-ATPase; protein precursor undergoes self-catalyzed splicing to yield the exten Tlp1p and the intein Vde (PI-Scel), which is a site-specific endonuclease           |
| YBL036C  | <b>Ybi036c</b> | 4                                   | Putative non-specific single-domain racemase, based on structural similarity; binds pyruvate; expression of GFP-fusion protein induced in response to the DNA-damaging agent MMS                                                                   |
| YDR002W  | <b>Yrb1</b>    | 4                                   | Ran GTPase binding protein; involved in nuclear protein import and RNA export, ubiquitin-mediated protein degradation during the cell cycle; shuttles between the nucleus and cytoplasm; is essential, homolog of human RanBP1                     |



**Table S1 part B : List of the 67 proteins bound to AMP-affinity resin at least twice on 3 independent experiments**

| OFN name  | PROTEIN name | Fold found on AMP-resin (3 columns) | Protein function                                                                                                                                                                                                                                |
|-----------|--------------|-------------------------------------|-------------------------------------------------------------------------------------------------------------------------------------------------------------------------------------------------------------------------------------------------|
| YFL039C   | Act1         | 3                                   | Actin, structural protein involved in cell polarization, endocytosis, and other cytoskeletal functions                                                                                                                                          |
| YOL086C   | Adh1         | 3                                   | Alcohol dehydrogenase, fermentative isozyme active as homo- or heterotetramers; required for the reduction of acetaldehyde to ethanol, the last step in the glycolytic pathway                                                                  |
| YJR105W   | Ado1         | 3                                   | Adenosine kinase, required for the utilization of S-adenosylmethionine (AdoMet); may be involved in recycling adenosine produced through the methyl cycle                                                                                       |
| YML022W   | Apt1         | 3                                   | Adenine phosphoribosyltransferase, catalyzes the formation of AMP from adenine and 5-phosphoribosylpyrophosphate; involved in the salvage pathway of purine nucleotide biosynthesis                                                             |
| YAL038W   | Cdc19        | 3                                   | Pyruvate kinase, functions as a homotetramer in glycolysis to convert phosphoenolpyruvate to pyruvate, the input for aerobic (TCA cycle) or anaerobic (glucose fermentation) respiration                                                        |
| YAL003W   | Efb1         | 3                                   | Translation elongation factor 1 beta; stimulates nucleotide exchange to regenerate EF-1 alpha-GTP for the next elongation cycle; part of the EF-1 complex, which facilitates binding of aminoacyl-tRNA to the ribosomal A site                  |
| YOR133W   | Eft1         | 3                                   | Elongation factor 2 (EF-2), also encoded by EFT2; catalyzes ribosomal translocation during protein synthesis; contains diphthamide, the unique posttranslationally modified histidine residue specifically ADP-ribosylated by diphtheria toxin  |
| YHR174W   | Eno2         | 3                                   | Enolase II, a phosphopyruvate hydratase that catalyzes the conversion of 2-phosphoglycerate to phosphoenolpyruvate during glycolysis and the reverse reaction during gluconeogenesis; expression is induced in response to glucose              |
| YPR035W   | Gln1         | 3                                   | Glutamine synthetase (GS), synthesizes glutamine from glutamate and ammonia; with Glt1p, forms the secondary pathway for glutamate biosynthesis from ammonia; expression regulated by nitrogen source and by amino acid limitation              |
| YDL125C   | Hnt1         | 3                                   | Adenosine 5'-monophosphoramidase; interacts physically and genetically with Kin28p, a CDK and TFIIB subunit, and genetically with CAK1; member of the histidine triad (HIT) superfamily of nucleotide-binding proteins and similar to Hint      |
| YMR186W   | Hsc82        | 3                                   | Cytoplasmic chaperone of the Hsp90 family, redundant in function and nearly identical with Hsp82p, and together they are essential; expressed constitutively at 10-fold higher basal levels than HSP82 and induced 2-3 fold by heat shock       |
| YLR259C   | Hsp60        | 3                                   | Tetradecameric mitochondrial chaperonin required for ATP-dependent folding of precursor polypeptides and complex assembly; prevents aggregation and mediates protein refolding after heat shock; role in mtDNA transmission; phosphorylated     |
| YLR432W   | Imd3         | 3                                   | Inosine monophosphate dehydrogenase, catalyzes the first step of GMP biosynthesis, member of a four-gene family in <i>S. cerevisiae</i> , constitutively expressed                                                                              |
| YJL034W   | Kar2         | 3                                   | ATPase involved in protein import into the ER, also acts as a chaperone to mediate protein folding in the ER and may play a role in ER export of soluble proteins; regulates the unfolded protein response via interaction with Ire1p           |
| YLR044C   | Pdc1         | 3                                   | Major of three pyruvate decarboxylase isozymes, key enzyme in alcoholic fermentation, decarboxylates pyruvate to acetaldehyde; subject to glucose-, ethanol-, and autoregulation; involved in amino acid catabolism                             |
| YCR012W   | Pgk1         | 3                                   | 3-phosphoglycerate kinase, catalyzes transfer of high-energy phosphoryl groups from the acyl phosphate of 1,3-bisphosphoglycerate to ADP to produce ATP; key enzyme in glycolysis and gluconeogenesis                                           |
| YHR037W   | Put2         | 3                                   | Delta-1-pyrroline-5-carboxylate dehydrogenase, nuclear-encoded mitochondrial protein involved in utilization of proline as sole nitrogen source; deficiency of the human homolog causes HPII, an autosomal recessive inborn error of metabolism |
| YMR142C   | Rpl13b       | 3                                   | Protein component of the large (60S) ribosomal subunit, nearly identical to Rpl13Ap; not essential for viability; has similarity to rat L13 ribosomal protein                                                                                   |
| YBR031W   | Rpl4a        | 3                                   | N-terminally acetylated protein component of the large (60S) ribosomal subunit, nearly identical to Rpl4Bp and has similarity to E. coli L4 and rat L4 ribosomal proteins                                                                       |
| YER043C   | Sah1         | 3                                   | S-adenosyl-L-homocysteine hydrolase, catabolizes S-adenosyl-L-homocysteine which is formed after donation of the activated methyl group of S-adenosyl-L-methionine (AdoMet) to an acceptor                                                      |
| YAL005C   | Ssa1         | 3                                   | ATPase involved in protein folding and nuclear localization signal (NLS)-directed nuclear transport; member of heat shock protein 70 (HSP70) family; forms a chaperone complex with Ydj1p;                                                      |
| YLL024C   | Ssa2         | 3                                   | ATP binding protein involved in protein folding and vacuolar import of proteins; member of heat shock protein 70 (HSP70) family; associated with the chaperonin-containing T-complex                                                            |
| YDL229W   | Ssb1         | 3                                   | Cytoplasmic ATPase that is a ribosome-associated molecular chaperone, functions with J-protein partner Zuo1p; may be involved in folding of newly-made polypeptide chains; member of the HSP70 family; interacts with phosphatase subunit Reg1  |
| YNL209W   | Ssb2         | 3                                   | Cytoplasmic ATPase that is a ribosome-associated molecular chaperone, functions with J-protein partner Zuo1p; may be involved in the folding of newly-synthesized polypeptide chains; member of the HSP70 family; homolog of SSB1               |
| YJR045C   | Ssc1         | 3                                   | Hsp70 family ATPase, constituent of the import motor component of the Translocase of the Inner Mitochondrial membrane (TIM23 complex); involved in protein translocation and folding; subunit of Scl endonuclease                               |
| YJL052W   | Tdh1         | 3                                   | Glyceraldehyde-3-phosphate dehydrogenase, isozyme 1, involved in glycolysis and gluconeogenesis; tetramer that catalyzes the reaction of glyceraldehyde-3-phosphate to 1,3 bis-phosphoglycerate; detected in the cytoplasm and cell wall        |
| YJR009C   | Tdh2         | 3                                   | Glyceraldehyde-3-phosphate dehydrogenase, isozyme 2, involved in glycolysis and gluconeogenesis; tetramer that catalyzes the reaction of glyceraldehyde-3-phosphate to 1,3 bis-phosphoglycerate; detected in the cytoplasm and cell wall        |
| YGR192C   | Tdh3         | 3                                   | Glyceraldehyde-3-phosphate dehydrogenase, isozyme 3, involved in glycolysis and gluconeogenesis; tetramer that catalyzes the reaction of glyceraldehyde-3-phosphate to 1,3 bis-phosphoglycerate; detected in the cytoplasm and cell wall        |
| YPR080W   | Tef1         | 3                                   | Translational elongation factor EF-1 alpha; also encoded by TEF2; functions in the binding reaction of aminoacyl-tRNA (AA-tRNA) to ribosomes; may also have a role in tRNA re-export from the nucleus                                           |
| YKL067W   | Ynk1         | 3                                   | Nucleoside diphosphate kinase, catalyzes the transfer of gamma phosphates from nucleoside triphosphates, usually ATP, to nucleoside diphosphates by a mechanism that involves formation of an autophosphorylated enzyme intermediate            |
| YLR153C   | Acs2         | 2                                   | Acetyl-coA synthetase isoform which, along with Acs1p, is the nuclear source of acetyl-coA for histone acetylation; mutants affect global transcription; required for growth on glucose; expressed under anaerobic conditions                   |
| YLR028C   | Ade16        | 2                                   | Enzyme of 'de novo' purine biosynthesis containing both 5-aminoimidazole-4-carboxamide ribonucleotide formyltransferase and inosine monophosphate cyclodiolase activities, isozyme of Ade17p; ade16 ade17 mutants require adenine and histidine |
| YLR109W   | Ahp1         | 2                                   | Thiol-specific peroxidase, reduces hydroperoxides to protect against oxidative damage; function in vivo requires covalent conjugation to Urm1p                                                                                                  |
| YMR116C   | Asc1         | 2                                   | G-protein beta subunit and guanine nucleotide dissociation inhibitor for Gpa2p; ortholog of RACK1 that inhibits translation; core component of the small (40S) ribosomal subunit; represses Gcn4p in the absence of amino acid starvation       |
| YFL028C   | Caf16        | 2                                   | Part of evolutionarily-conserved CCR4-NOT regulatory complex; contains single ABC-type ATPase domain but no transmembrane domain; interacts with several subunits of Mediator                                                                   |
| YMR173W   | Ddr48        | 2                                   | DNA damage-responsive protein, expression is increased in response to heat-shock stress or treatments that produce DNA lesions; contains multiple repeats of the amino acid sequence NNNDYSYGs                                                  |
| YKL054C   | Def1         | 2                                   | RNAPII degradation factor, forms a complex with Rad26p in chromatin, enables ubiquitination and proteolysis of RNAPII present in an elongation complex; mutant is deficient in Zip1p loading onto chromosomes during meiosis                    |
| YMR124W   | Epo1         | 2                                   | Protein involved in septin-ER tethering; interacts with ER membrane protein, Scs2p, and Shs1p, a septin ring component, at bud neck to create ER diffusion barrier                                                                              |
| YMR029C   | Far8         | 2                                   | Protein involved in recovery from cell cycle arrest in response to pheromone, in a Far1p-independent pathway; interacts with Far3p, Far7p, Far9p, Far10p, and Far11p                                                                            |
| YNL068C   | Fkh2         | 2                                   | Forkhead family transcription factor with a major role in the expression of G2/M phase genes; positively regulates transcriptional elongation; negative role in chromatin silencing at HML and HMR; substrate of the Cdc28p/Cln5p kinase        |
| YDR236C   | Fmn1         | 2                                   | Riboflavin kinase, phosphorylates riboflavin to form riboflavin monophosphate (FMN), which is a necessary cofactor for many enzymes; localizes to microsomes and to the mitochondrial inner membrane                                            |
| YHR176W   | Fmo1         | 2                                   | Flavin-containing monooxygenase, localized to the cytoplasmic face of the ER membrane; catalyzes oxidation of biological thiols to maintain the ER redox buffer ratio for correct folding of disulfide-bonded proteins                          |
| YKL152C   | Gpm1         | 2                                   | Tetrameric phosphoglycerate mutase, mediates the conversion of 3-phosphoglycerate to 2-phosphoglycerate during glycolysis and the reverse reaction during gluconeogenesis                                                                       |
| YOR020C   | Hsp10        | 2                                   | Mitochondrial matrix co-chaperonin that inhibits the ATPase activity of Hsp60p, a mitochondrial chaperonin; involved in protein folding and sorting in the mitochondria; 10 kD heat shock protein with similarity to E. coli groES              |
| YLR355C   | Iiv5         | 2                                   | Bifunctional acetoacetyl-CoA reductoisomerase and mtDNA binding protein; involved in branched-chain amino acid biosynthesis and maintenance of wild-type mitochondrial DNA; found in mitochondrial nucleoids                                    |
| YML056C   | Imd4         | 2                                   | Inosine monophosphate dehydrogenase, catalyzes the first step of GMP biosynthesis, member of a four-gene family in <i>S. cerevisiae</i> , constitutively expressed                                                                              |
| YOR197W   | Mca1         | 2                                   | Putative cysteine protease similar to mammalian caspases; involved in regulation of apoptosis upon H2O2 treatment; contributes to clearance of insoluble protein aggregates during normal growth; may be involved in cell cycle progression     |
| YLR203C   | Mss51        | 2                                   | Specific translational activator for the mitochondrial COX1 mRNA; loosely associated with the matrix face of the mitochondrial inner membrane; influences both COX1 mRNA translation and Cox1p assembly into cytochrome c oxidase               |
| YKR080W   | Mtd1         | 2                                   | NAD-dependent 5,10-methylenetetrahydrofolate dehydrogenase, plays a catalytic role in oxidation of cytoplasmic one-carbon units; expression is regulated by Bas1p and Bas2p, repressed by adenine, and may be induced by inositol and choline   |
| YDR432W   | Npl3         | 2                                   | RNA-binding protein that promotes elongation, regulates termination, and carries poly(A) mRNA from nucleus to cytoplasm; required for pre-mRNA splicing; dissociation from mRNAs promoted by Mtr10p; phosphorylated by Sky1p in the cytoplasm   |
| YJL041W   | Nsp1         | 2                                   | Essential component of the nuclear pore complex, which mediates nuclear import and export, found in both the Nup82 and Nic96 complexes                                                                                                          |
| YLR335W   | Nup2         | 2                                   | Nucleoporin involved in nucleocytoplasmic transport, binds to either the nucleoplasmic or cytoplasmic faces of the nuclear pore complex depending on Ran-GTP levels; also has a role in chromatin organization                                  |
| YIR006C   | Pan1         | 2                                   | Part of actin cytoskeleton-regulatory complex Pan1p-Sla1p-End3p, associates with actin patches on the cell cortex; promotes protein-protein interactions essential for endocytosis; previously thought to be a subunit of poly(A) ribonuclease  |
| YDL055C   | Psa1         | 2                                   | GDP-mannose pyrophosphorylase (mannose-1-phosphate guanylyltransferase), synthesizes GDP-mannose from GTP and mannose-1-phosphate in cell wall biosynthesis; required for normal cell wall structure                                            |
| YEL054C   | Rpl12a       | 2                                   | Protein component of the large (60S) ribosomal subunit, nearly identical to Rpl12Bp; rpl12a rpl12b double mutant exhibits slow growth and slow translation; has similarity to E. coli L11 and rat L12 ribosomal proteins                        |
| YBR084C-A | Rpl19a       | 2                                   | Protein component of the large (60S) ribosomal subunit, nearly identical to Rpl19Bp and has similarity to rat L19 ribosomal protein; rpl19a and rpl19b single null mutations result in slow growth, while the double null mutation is lethal    |
| YLR344W   | Rpl26a       | 2                                   | Protein component of the large (60S) ribosomal subunit, nearly identical to Rpl26Bp and has similarity to E. coli L24 and rat L26 ribosomal proteins; binds to 5.8S rRNA                                                                        |
| YBL092W   | Rpl32        | 2                                   | Protein component of the large (60S) ribosomal subunit, has similarity to rat L32 ribosomal protein; overexpression disrupts telomeric silencing                                                                                                |
| YGL076C   | Rpl7a        | 2                                   | Protein component of the large (60S) ribosomal subunit, nearly identical to Rpl7Bp and has similarity to E. coli L30 and rat L7 ribosomal proteins; contains a conserved C-terminal Nucleic acid Binding Domain (NDB2)                          |
| YGL147C   | Rpl9a        | 2                                   | Protein component of the large (60S) ribosomal subunit, nearly identical to Rpl9Bp and has similarity to E. coli L6 and rat L9 ribosomal proteins                                                                                               |
| YCR031C   | Rps14a       | 2                                   | Ribosomal protein 59 of the small subunit, required for ribosome assembly and 20S pre-rRNA processing; mutations confer cryptopleurine resistance; nearly identical to Rps14Bp and similar to E. coli S11 and rat S14 ribosomal proteins        |
| YJL121C   | Rps19a       | 2                                   | Protein component of the small (40S) ribosomal subunit, required for assembly and maturation of pre-40 S particles; mutations in human RPS19 are associated with Diamond Blackfan anemia; nearly identical to Rps19Bp                           |
| YNL178W   | Rps3         | 2                                   | Protein component of the small (40S) ribosomal subunit, has apurinic/apyrimidinic (AP) endonuclease activity; essential for viability; has similarity to E. coli S3 and rat S3 ribosomal proteins                                               |
| YJR123W   | Rps5         | 2                                   | Protein component of the small (40S) ribosomal subunit, the least basic of the non-acidic ribosomal proteins; phosphorylated in vivo; essential for viability; has similarity to E. coli S7 and rat S5 ribosomal proteins                       |
| YNL096C   | Rps7b        | 2                                   | Protein component of the small (40S) ribosomal subunit, nearly identical to Rps7Ap; interacts with Kti11p; deletion causes hypersensitivity to zymocin; has similarity to rat S7 and Xenopus S8 ribosomal proteins                              |
| YER081W   | Ser3         | 2                                   | 3-phosphoglycerate dehydrogenase, catalyzes the first step in serine and glycine biosynthesis; isozyme of Ser33p                                                                                                                                |
| YIL074C   | Ser33        | 2                                   | 3-phosphoglycerate dehydrogenase, catalyzes the first step in serine and glycine biosynthesis; isozyme of Ser3p                                                                                                                                 |

**Table S1 part B (continued)**

| OFR name | PROTEIN name | Fold found on AMP-resin (3 columns) | Protein function                                                                                                                                                                                                                                       |
|----------|--------------|-------------------------------------|--------------------------------------------------------------------------------------------------------------------------------------------------------------------------------------------------------------------------------------------------------|
| YNL167C  | <b>Sko1</b>  | 2                                   | Basic leucine zipper transcription factor of the ATF/CREB family; forms a complex with Tup1p and Cyc8p to both activate and repress transcription; cytosolic and nuclear protein involved in osmotic and oxidative stress responses                    |
| YBL007C  | <b>Sla1</b>  | 2                                   | Cytoskeletal protein binding protein required for assembly of the cortical actin cytoskeleton; interacts with proteins regulating actin dynamics and proteins required for endocytosis; found in the nucleus and cell cortex; has 3 SH3 domains        |
| YBL075C  | <b>Ssa3</b>  | 2                                   | ATPase involved in protein folding and the response to stress; plays a role in SRP-dependent cotranslational protein-membrane targeting and translocation; member of the heat shock protein 70 (HSP70) family; localized to the cytoplasm              |
| YER103W  | <b>Ssa4</b>  | 2                                   | Heat shock protein that is highly induced upon stress; plays a role in SRP-dependent cotranslational protein-membrane targeting and translocation; member of the HSP70 family; cytoplasmic protein that concentrates in nuclei upon starvation         |
| YPL106C  | <b>Sse1</b>  | 2                                   | ATPase that is a component of the heat shock protein Hsp90 chaperone complex; binds unfolded proteins; member of the heat shock protein 70 (HSP70) family; localized to the cytoplasm                                                                  |
| YLR369W  | <b>Ssq1</b>  | 2                                   | Mitochondrial hsp70-type molecular chaperone, required for assembly of iron/sulfur clusters into proteins at a step after cluster synthesis, and for maturation of Yfh1p, which is a homolog of human frataxin implicated in Friedreich's ataxia       |
| YOR027W  | <b>Sti1</b>  | 2                                   | Hsp90 cochaperone, interacts with the Ssa group of the cytosolic Hsp70 chaperones and activates Ssa1p ATPase activity; interacts with Hsp90 chaperones and inhibits their ATPase activity; homolog of mammalian Hop                                    |
| YLR150W  | <b>Stm1</b>  | 2                                   | Protein required for optimal translation under nutrient stress; perturbs association of Yef3p with ribosomes; involved in TOR signaling; binds G4 quadruplex and purine motif triplex nucleic acid; helps maintain telomere structure                  |
| YDL084W  | <b>Sub2</b>  | 2                                   | Component of the TREX complex required for nuclear mRNA export; member of the DEAD-box RNA helicase superfamily and is involved in early and late steps of spliceosome assembly; homolog of the human splicing factor hUAP56                           |
| YKR059W  | <b>Tif1</b>  | 2                                   | Translation initiation factor eIF4A, identical to Tif2p; DEA(D/H)-box RNA helicase that couples ATPase activity to RNA binding and unwinding; forms a dumbbell structure of two compact domains connected by a linker; interacts with eIF4G            |
| YPR163C  | <b>Tif3</b>  | 2                                   | Translation initiation factor eIF-4B, has RNA annealing activity; contains an RNA recognition motif and binds to single-stranded RNA                                                                                                                   |
| YML028W  | <b>Tsa1</b>  | 2                                   | Thioredoxin peroxidase, acts as both a ribosome-associated and free cytoplasmic antioxidant; self-associates to form a high-molecular weight chaperone complex under oxidative stress; deletion results in mutator phenotype                           |
| YCR084C  | <b>Tup1</b>  | 2                                   | General repressor of transcription, forms complex with Cyc8p, involved in the establishment of repressive chromatin structure through interactions with histones H3 and H4, appears to enhance expression of some genes                                |
| YDL185W  | <b>Vma1</b>  | 2                                   | Subunit A of the eight-subunit V1 peripheral membrane domain of the vacuolar H <sup>+</sup> -ATPase; protein precursor undergoes self-catalyzed splicing to yield the extein Tfp1p and the intein Vde (Pi-Scel), which is a site-specific endonuclease |

**Table S1 part C : List of proteins bound to SZMP-affinity resin at least three times on 4 independent experiments**

| ORF name  | Protein name  | Fold found on SZMP-resin (4 columns) | Protein function                                                                                                                                                                                                                                 |
|-----------|---------------|--------------------------------------|--------------------------------------------------------------------------------------------------------------------------------------------------------------------------------------------------------------------------------------------------|
| YOR198C   | <b>Bfr1</b>   | 4                                    | Component of mRNP complexes associated with polyribosomes; implicated in secretion and nuclear segregation; multicopy suppressor of BFA (Brefeldin A) sensitivity                                                                                |
| YAL038W   | <b>Cdc19</b>  | 4                                    | Pyruvate kinase, functions as a homotetramer in glycolysis to convert phosphoenolpyruvate to pyruvate, the input for aerobic (TCA cycle) or anaerobic (glucose fermentation) respiration                                                         |
| YHR019C   | <b>Dec81</b>  | 4                                    | Cytosolic asparaginyl-tRNA synthetase, required for protein synthesis, catalyzes the specific attachment of asparagine to its cognate tRNA                                                                                                       |
| YOR133W   | <b>Eft1</b>   | 4                                    | Elongation factor 2 (EF-2), also encoded by EFT2; catalyzes ribosomal translocation during protein synthesis; contains diphthamide, the unique posttranslationally modified histidine residue specifically ADP-ribosylated by diphtheria toxin   |
| YDR385W   | <b>Eft2</b>   | 4                                    | Elongation factor 2 (EF-2), also encoded by EFT1; catalyzes ribosomal translocation during protein synthesis; contains diphthamide, the unique posttranslationally modified histidine residue specifically ADP-ribosylated by diphtheria toxin   |
| YHR193C   | <b>Egd2</b>   | 4                                    | Alpha subunit of the heteromeric nascent polypeptide-associated complex (NAC) involved in protein sorting and translocation, associated with cytoplasmic ribosomes                                                                               |
| YER025W   | <b>Gcd11</b>  | 4                                    | Gamma subunit of the translation initiation factor eIF2, involved in the identification of the start codon; binds GTP when forming the ternary complex with GTP and tRNAi-Met                                                                    |
| YDR091C   | <b>Rli1</b>   | 4                                    | Essential iron-sulfur protein required for ribosome biogenesis and translation initiation and termination; facilitates binding of a multifactor complex (MFC) of initiation factors to the small ribosomal subunit; predicted ABC family ATPase  |
| YPR102C   | <b>Rpl11a</b> | 4                                    | Protein of the large 60S ribosomal subunit, nearly identical to Rpl11Bp but expressed at twice the level; involved in ribosomal assembly; depletion causes degradation of 60S proteins and RNA; similar to E. coli L5 and rat L11                |
| YGR085C   | <b>Rpl11b</b> | 4                                    | Protein component of the large (60S) ribosomal subunit, nearly identical to Rpl11Ap; involved in ribosomal assembly; depletion causes degradation of proteins and RNA of the 60S subunit; has similarity to E. coli L5 and rat L11               |
| YMR142C   | <b>Rpl13b</b> | 4                                    | Protein component of the large (60S) ribosomal subunit, nearly identical to Rpl13Ap; not essential for viability; has similarity to rat L13 ribosomal protein                                                                                    |
| YNL069C   | <b>Rpl16b</b> | 4                                    | N-terminally acetylated protein component of the large (60S) ribosomal subunit, binds to 5.8 S rRNA; has similarity to Rpl16Ap, E. coli L13 and rat L13a ribosomal proteins; transcriptionally regulated by Rap1p                                |
| YKL180W   | <b>Rpl17a</b> | 4                                    | Protein component of the large (60S) ribosomal subunit, nearly identical to Rpl17Bp and has similarity to E. coli L22 and rat L17 ribosomal proteins; copurifies with the Dam1 complex (aka DASH complex)                                        |
| YBR084C-A | <b>Rpl19a</b> | 4                                    | Protein component of the large (60S) ribosomal subunit, nearly identical to Rpl19Bp and has similarity to rat L19 ribosomal protein; rpl19a and rpl19b single null mutations result in slow growth, while the double null mutation is lethal     |
| YBL027W   | <b>Rpl19b</b> | 4                                    | Protein component of the large (60S) ribosomal subunit, nearly identical to Rpl19Ap and has similarity to rat L19 ribosomal protein; rpl19a and rpl19b single null mutations result in slow growth, while the double null mutation is lethal     |
| YPL220W   | <b>Rpl1a</b>  | 4                                    | N-terminally acetylated protein component of the large (60S) ribosomal subunit, nearly identical to Rpl1Bp and has similarity to E. coli L1 and rat L10a ribosomal proteins; rpl1a rpl1b double null mutation is lethal                          |
| YGL135W   | <b>Rpl1b</b>  | 4                                    | N-terminally acetylated protein component of the large (60S) ribosomal subunit, nearly identical to Rpl1Ap and has similarity to E. coli L1 and rat L10a ribosomal proteins; rpl1a rpl1b double null mutation is lethal                          |
| YMR242C   | <b>Rpl20a</b> | 4                                    | Protein component of the large (60S) ribosomal subunit, nearly identical to Rpl20Bp and has similarity to rat L18a ribosomal protein                                                                                                             |
| YOR312C   | <b>Rpl20b</b> | 4                                    | Protein component of the large (60S) ribosomal subunit, nearly identical to Rpl20Ap and has similarity to rat L18a ribosomal protein                                                                                                             |
| YGR034W   | <b>Rpl26b</b> | 4                                    | Protein component of the large (60S) ribosomal subunit, nearly identical to Rpl26Ap and has similarity to E. coli L24 and rat L26 ribosomal proteins; binds to 5.8S rRNA                                                                         |
| YHR010W   | <b>Rpl27a</b> | 4                                    | Protein component of the large (60S) ribosomal subunit, nearly identical to Rpl27Bp and has similarity to rat L27 ribosomal protein                                                                                                              |
| YDR471W   | <b>Rpl27b</b> | 4                                    | Protein component of the large (60S) ribosomal subunit, nearly identical to Rpl27Ap and has similarity to rat L27 ribosomal protein                                                                                                              |
| YOR063W   | <b>Rpl3</b>   | 4                                    | Protein component of the large (60S) ribosomal subunit, has similarity to E. coli L3 and rat L3 ribosomal proteins; involved in the replication and maintenance of killer double stranded RNA virus                                              |
| YDL075W   | <b>Rpl31a</b> | 4                                    | Protein component of the large (60S) ribosomal subunit, nearly identical to Rpl31Bp and has similarity to rat L31 ribosomal protein; associates with the karyopherin Sxm1p; loss of both Rpl31p and Rpl39p confers lethality                     |
| YPL143W   | <b>Rpl33a</b> | 4                                    | N-terminally acetylated ribosomal protein L37 of the large (60S) ribosomal subunit, nearly identical to Rpl33Bp and has similarity to rat L35a; rpl33a null mutant exhibits slow growth while rpl33a rpl33b double null mutant is inviable       |
| YPL249C-A | <b>Rpl36b</b> | 4                                    | Protein component of the large (60S) ribosomal subunit, nearly identical to Rpl36Ap and has similarity to rat L36 ribosomal protein; binds to 5.8 S rRNA                                                                                         |
| YBR031W   | <b>Rpl4a</b>  | 4                                    | N-terminally acetylated protein component of the large (60S) ribosomal subunit, nearly identical to Rpl4Bp and has similarity to E. coli L4 and rat L4 ribosomal proteins                                                                        |
| YPL131W   | <b>Rpl5</b>   | 4                                    | Protein component of the large (60S) ribosomal subunit with similarity to E. coli L18 and rat L5 ribosomal proteins; binds 5S rRNA and is required for 60S subunit assembly                                                                      |
| YML073C   | <b>Rpl6a</b>  | 4                                    | N-terminally acetylated protein component of the large (60S) ribosomal subunit, has similarity to Rpl6Bp and to rat L6 ribosomal protein; binds to 5.8S rRNA                                                                                     |
| YGL076C   | <b>Rpl7a</b>  | 4                                    | Protein component of the large (60S) ribosomal subunit, nearly identical to Rpl7Bp and has similarity to E. coli L30 and rat L7 ribosomal proteins; contains a conserved C-terminal Nucleic acid Binding Domain (NDB2)                           |
| YLR340W   | <b>Rpp0</b>   | 4                                    | Conserved ribosomal protein P0 of the ribosomal stalk, which is involved in interaction between translational elongation factors and the ribosome; similar to rat P0, human P0, and E. coli L10e; phosphorylated on serine 302                   |
| YOR369C   | <b>Rps12</b>  | 4                                    | Protein component of the small (40S) ribosomal subunit; has similarity to rat ribosomal protein S12                                                                                                                                              |
| YCR031C   | <b>Rps14a</b> | 4                                    | Ribosomal protein 59 of the small subunit, required for ribosome assembly and 20S pre-rRNA processing; mutations confer cryptopleurine resistance; nearly identical to Rps14Bp and similar to E. coli S11 and rat S14 ribosomal proteins         |
| YJL191W   | <b>Rps14b</b> | 4                                    | Ribosomal protein 59 of the small subunit, required for ribosome assembly and 20S pre-rRNA processing; mutations confer cryptopleurine resistance; nearly identical to Rps14Ap and similar to E. coli S11 and rat S14 ribosomal proteins         |
| YOL040C   | <b>Rps15</b>  | 4                                    | Protein component of the small (40S) ribosomal subunit; has similarity to E. coli S19 and rat S15 ribosomal proteins                                                                                                                             |
| YMR143W   | <b>Rps16a</b> | 4                                    | Protein component of the small (40S) ribosomal subunit; identical to Rps16Bp and has similarity to E. coli S9 and rat S16 ribosomal proteins                                                                                                     |
| YDL083C   | <b>Rps16b</b> | 4                                    | Protein component of the small (40S) ribosomal subunit; identical to Rps16Ap and has similarity to E. coli S9 and rat S16 ribosomal proteins                                                                                                     |
| YML024W   | <b>Rps17a</b> | 4                                    | Ribosomal protein 51 (p51) of the small (40s) subunit; nearly identical to Rps17Bp and has similarity to rat S17 ribosomal protein                                                                                                               |
| YDR447C   | <b>Rps17b</b> | 4                                    | Ribosomal protein 51 (p51) of the small (40s) subunit; nearly identical to Rps17Ap and has similarity to rat S17 ribosomal protein                                                                                                               |
| YDR450W   | <b>Rps18a</b> | 4                                    | Protein component of the small (40S) ribosomal subunit; nearly identical to Rps18Bp and has similarity to E. coli S13 and rat S18 ribosomal proteins                                                                                             |
| YML026C   | <b>Rps18b</b> | 4                                    | Protein component of the small (40S) ribosomal subunit; nearly identical to Rps18Ap and has similarity to E. coli S13 and rat S18 ribosomal proteins                                                                                             |
| YOL121C   | <b>Rps19a</b> | 4                                    | Protein component of the small (40S) ribosomal subunit, required for assembly and maturation of pre-40 S particles; mutations in human RPS19 are associated with Diamond Blackfan anemia; nearly identical to Rps19Bp                            |
| YNL302C   | <b>Rps19b</b> | 4                                    | Protein component of the small (40S) ribosomal subunit, required for assembly and maturation of pre-40 S particles; mutations in human RPS19 are associated with Diamond Blackfan anemia; nearly identical to Rps19Ap                            |
| YLR441C   | <b>Rps1a</b>  | 4                                    | Ribosomal protein 10 (p10) of the small (40S) subunit; nearly identical to Rps1Bp and has similarity to rat S3a ribosomal protein                                                                                                                |
| YML063W   | <b>Rps1b</b>  | 4                                    | Ribosomal protein 10 (p10) of the small (40S) subunit; nearly identical to Rps1Ap and has similarity to rat S3a ribosomal protein                                                                                                                |
| YGL123W   | <b>Rps2</b>   | 4                                    | Protein component of the small (40S) subunit, essential for control of translational accuracy; phosphorylation by C-terminal domain kinase I (CTDK-I) enhances translational accuracy; methylated on one or more arginine residues by Hmt1p      |
| YHL015W   | <b>Rps20</b>  | 4                                    | Protein component of the small (40S) ribosomal subunit; overproduction suppresses mutations affecting RNA polymerase III-dependent transcription; has similarity to E. coli S10 and rat S20 ribosomal proteins                                   |
| YNL178W   | <b>Rps3</b>   | 4                                    | Protein component of the small (40S) ribosomal subunit, has apurinic/apyrimidinic (AP) endonuclease activity; essential for viability; has similarity to E. coli S3 and rat S3 ribosomal proteins                                                |
| YJR145C   | <b>Rps4a</b>  | 4                                    | Protein component of the small (40S) ribosomal subunit; mutation affects 20S pre-rRNA processing; identical to Rps4Bp and has similarity to rat S4 ribosomal protein                                                                             |
| YHR203C   | <b>Rps4b</b>  | 4                                    | Protein component of the small (40S) ribosomal subunit; identical to Rps4Ap and has similarity to rat S4 ribosomal protein                                                                                                                       |
| YJR123W   | <b>Rps5</b>   | 4                                    | Protein component of the small (40S) ribosomal subunit; the least basic of the non-acidic ribosomal proteins; phosphorylated in vivo; essential for viability; has similarity to E. coli S7 and rat S5 ribosomal proteins                        |
| YBL072C   | <b>Rps8a</b>  | 4                                    | Protein component of the small (40S) ribosomal subunit; identical to Rps8Bp and has similarity to rat S8 ribosomal protein                                                                                                                       |
| YER102W   | <b>Rps8b</b>  | 4                                    | Protein component of the small (40S) ribosomal subunit; identical to Rps8Ap and has similarity to rat S8 ribosomal protein                                                                                                                       |
| YPL081W   | <b>Rps9a</b>  | 4                                    | Protein component of the small (40S) ribosomal subunit; nearly identical to Rps9Bp and has similarity to E. coli S4 and rat S9 ribosomal proteins                                                                                                |
| YBR189W   | <b>Rps9b</b>  | 4                                    | Protein component of the small (40S) ribosomal subunit; nearly identical to Rps9Ap and has similarity to E. coli S4 and rat S9 ribosomal proteins                                                                                                |
| YLR058C   | <b>Shm2</b>   | 4                                    | Cytosolic serine hydroxymethyltransferase, converts serine to glycine plus 5,10 methylenetetrahydrofolate; major isoform involved in generating precursors for purine, pyrimidine, amino acid, and lipid biosynthesis                            |
| YLL024C   | <b>Ssa2</b>   | 4                                    | ATP binding protein involved in protein folding and vacuolar import of proteins; member of heat shock protein 70 (HSP70) family; associated with the chaperonin-containing T-complex                                                             |
| YNL209W   | <b>Ssb2</b>   | 4                                    | Cytoplasmic ATPase that is a ribosome-associated molecular chaperone, functions with J-protein partner Zuo1p; may be involved in the folding of newly-synthesized polypeptide chains; member of the HSP70 family; homolog of SSB1                |
| YLR150W   | <b>Stm1</b>   | 4                                    | Protein required for optimal translation under nutrient stress; perturbs association of Yef3p with ribosomes; involved in TOR signaling; binds G4 quadruplex and purine motif triplex nucleic acid; helps maintain telomere structure            |
| YPR080W   | <b>Tef1</b>   | 4                                    | Translational elongation factor EF-1 alpha; also encoded by TEF2; functions in the binding reaction of aminoacyl-tRNA (AA-tRNA) to ribosomes; may also have a role in tRNA re-export from the nucleus                                            |
| YBR118W   | <b>Tef2</b>   | 4                                    | Translational elongation factor EF-1 alpha; also encoded by TEF1; functions in the binding reaction of aminoacyl-tRNA (AA-tRNA) to ribosomes; may also have a role in tRNA re-export from the nucleus                                            |
| YLR249W   | <b>Tef3</b>   | 4                                    | Gamma subunit of translational elongation factor eEF1B, stimulates the binding of aminoacyl-tRNA (AA-tRNA) to ribosomes by releasing eEF1A (Tef1p/Tef2p) from the ribosomal complex; contains two ABC cassettes; binds and hydrolyzes ATP        |
| YFL039C   | <b>Act1</b>   | 3                                    | Actin, structural protein involved in cell polarization, endocytosis, and other cytoskeletal functions                                                                                                                                           |
| YOL139C   | <b>Cdc33</b>  | 3                                    | Cytoplasmic mRNA cap binding protein and translation initiation factor eIF4e; the eIF4E-cap complex is responsible for mediating cap-dependent mRNA translation via interactions with translation initiation factor eIF4G (Tif4631p or Tif4632p) |
| YNR001C   | <b>Cit1</b>   | 3                                    | Citrate synthase, catalyzes the condensation of acetyl coenzyme A and oxaloacetate to form citrate; the rate-limiting enzyme of the TCA cycle; nuclear encoded mitochondrial protein                                                             |
| YOR204W   | <b>Ded1</b>   | 3                                    | ATP-dependent DEAD (Asp-Glu-Ala-Asp)-box RNA helicase, required for translation initiation of all yeast mRNAs; mutations in human DEAD-box DBY are a frequent cause of male infertility                                                          |
| YLL018C   | <b>Dps1</b>   | 3                                    | Aspartyl-tRNA synthetase, primarily cytoplasmic; homodimeric enzyme that catalyzes the specific aspartylation of tRNA(Asp); class II aminoacyl-tRNA synthetase; binding to its own mRNA may confer autoregulation                                |
| YPL037C   | <b>Egd1</b>   | 3                                    | Subunit beta1 of the nascent polypeptide-associated complex (NAC) involved in protein targeting, associated with cytoplasmic ribosomes; enhances DNA binding of the Gal4p activator; homolog of human BTF3b                                      |
| YLR300W   | <b>Exg1</b>   | 3                                    | Major exo-1,3-beta-glucanase of the cell wall, involved in cell wall beta-glucan assembly; exists as three differentially glycosylated isoenzymes                                                                                                |
| YBR009C   | <b>Hhf1</b>   | 3                                    | Histone H4, core histone protein required for chromatin assembly and chromosome function; one of two identical histone proteins (see also HHF2); contributes to telomeric silencing; N-terminal domain involved in maintaining genomic integrity |
| YNL030W   | <b>Hhf2</b>   | 3                                    | Histone H4, core histone protein required for chromatin assembly and chromosome function; one of two identical histone proteins (see also HHF1); contributes to telomeric silencing; N-terminal domain involved in maintaining genomic integrity |
| YMR186W   | <b>Hsc82</b>  | 3                                    | Cytoplasmic chaperone of the Hsp90 family, redundant in function and nearly identical with Hsp82p, and together they are essential; expressed constitutively at 10-fold higher basal levels than HSP82 and induced 2-3 fold by heat shock        |
| YLR259C   | <b>Hsp60</b>  | 3                                    | Tetradecameric mitochondrial chaperonin required for ATP-dependent folding of precursor polypeptides and complex assembly; prevents aggregation and mediates protein refolding after heat shock; role in mtDNA transmission; phosphorylated      |

Table S1 part C (continued)

| ORF name  | Protein name  | Fold found on SZMP-resin (4 columns) | Protein function                                                                                                                                                                                                                                                 |
|-----------|---------------|--------------------------------------|------------------------------------------------------------------------------------------------------------------------------------------------------------------------------------------------------------------------------------------------------------------|
| YPR033C   | <b>Hst1</b>   | 3                                    | Cytoplasmic and mitochondrial histidine tRNA synthetase; efficient mitochondrial localization requires both a presequence and an amino-terminal sequence                                                                                                         |
| YEL034W   | <b>Hyp2</b>   | 3                                    | Translation elongation factor eIF-5A that may function in translation initiation; similar to and functionally redundant with Anb1p; structural homolog of bacterial EF-P; undergoes an essential hypusination modification                                       |
| YLR432W   | <b>Imd3</b>   | 3                                    | Inosine monophosphate dehydrogenase, catalyzes the first step of GMP biosynthesis, member of a four-gene family in <i>S. cerevisiae</i> , constitutively expressed                                                                                               |
| YML056C   | <b>Imd4</b>   | 3                                    | Inosine monophosphate dehydrogenase, catalyzes the first step of GMP biosynthesis, member of a four-gene family in <i>S. cerevisiae</i> , constitutively expressed                                                                                               |
| YDR037W   | <b>Krs1</b>   | 3                                    | Protein component of the large (60S) ribosomal subunit, nearly identical to Rpl12Ap; rpl12a rpl12b double mutant exhibits slow growth and slow translation; has similarity to <i>E. coli</i> L11 and rat L12 ribosomal proteins                                  |
| YDL051W   | <b>Lhp1</b>   | 3                                    | RNA binding protein required for maturation of tRNA and U6 snRNA precursors; acts as a molecular chaperone for RNAs transcribed by polymerase III                                                                                                                |
| YPL004C   | <b>Lsp1</b>   | 3                                    | Primary component of eisosomes, which are large immobile patch structures at the cell cortex associated with endocytosis, along with Pil1p and Sur7p; null mutants show activation of Pkc1p/Ypk1p stress resistance pathways; member of the BAR domain family    |
| YKL009W   | <b>Mri4</b>   | 3                                    | Protein involved in mRNA turnover and ribosome assembly, localizes to the nucleolus                                                                                                                                                                              |
| YDL014W   | <b>Nop1</b>   | 3                                    | Nucleolar protein, component of the small subunit processome complex, which is required for processing of pre-18S rRNA; has similarity to mammalian fibrillarin                                                                                                  |
| YER159C   | <b>Nsr1</b>   | 3                                    | Nucleolar protein that binds nuclear localization sequences, required for pre-rRNA processing and ribosome biogenesis                                                                                                                                            |
| YGR165W   | <b>Pab1</b>   | 3                                    | Poly(A) binding protein, part of the 3'-end RNA-processing complex, mediates interactions between the 5' cap structure and the 3' mRNA poly(A) tail, involved in control of poly(A) tail length, interacts with translation factor eIF-4G                        |
| YGR086C   | <b>Pil1</b>   | 3                                    | Primary component of eisosomes, which are large immobile cell cortex structures associated with endocytosis; null mutants show activation of Pkc1p/Ypk1p stress resistance pathways                                                                              |
| YGL008C   | <b>Pma1</b>   | 3                                    | Plasma membrane H <sup>+</sup> -ATPase, pumps protons out of the cell; major regulator of cytoplasmic pH and plasma membrane potential; P2-type ATPase; Hsp30p plays a role in Pma1p regulation; interactions with Std1p appear to propagate [GAR <sup>+</sup> ] |
| YLR196W   | <b>Pwp1</b>   | 3                                    | Protein with WD-40 repeats involved in rRNA processing; associates with trans-acting ribosome biogenesis factors; similar to beta-transducin superfamily                                                                                                         |
| YEL054C   | <b>Rpl12a</b> | 3                                    | Protein component of the large (60S) ribosomal subunit, nearly identical to Rpl12Bp; rpl12a rpl12b double mutant exhibits slow growth and slow translation; has similarity to <i>E. coli</i> L11 and rat L12 ribosomal proteins                                  |
| YDR418W   | <b>Rpl12b</b> | 3                                    | Protein component of the large (60S) ribosomal subunit, nearly identical to Rpl12Ap; rpl12a rpl12b double mutant exhibits slow growth and slow translation; has similarity to <i>E. coli</i> L11 and rat L12 ribosomal proteins                                  |
| YDL082W   | <b>Rpl13a</b> | 3                                    | Protein component of the large (60S) ribosomal subunit, nearly identical to Rpl13Bp; not essential for viability; has similarity to rat L13 ribosomal protein                                                                                                    |
| YLR029C   | <b>Rpl15a</b> | 3                                    | Protein component of the large (60S) ribosomal subunit, nearly identical to Rpl15Bp and has similarity to rat L15 ribosomal protein; binds to 5.8 S rRNA                                                                                                         |
| YJL177W   | <b>Rpl17b</b> | 3                                    | Protein component of the large (60S) ribosomal subunit, nearly identical to Rpl17Ap and has similarity to <i>E. coli</i> L22 and rat L17 ribosomal proteins                                                                                                      |
| YOL120C   | <b>Rpl18a</b> | 3                                    | Protein component of the large (60S) ribosomal subunit, identical to Rpl18Bp and has similarity to rat L18 ribosomal protein; intron of RPL18A pre-mRNA forms stem-loop structures that are a target for Rnt1p cleavage leading to degradation                   |
| YNL301C   | <b>Rpl18b</b> | 3                                    | Protein component of the large (60S) ribosomal subunit, identical to Rpl18Ap and has similarity to rat L18 ribosomal protein                                                                                                                                     |
| YBR191W   | <b>Rpl21a</b> | 3                                    | Protein component of the large (60S) ribosomal subunit, nearly identical to Rpl21Bp and has similarity to rat L21 ribosomal protein                                                                                                                              |
| YPL079W   | <b>Rpl21b</b> | 3                                    | Protein component of the large (60S) ribosomal subunit, nearly identical to Rpl21Ap and has similarity to rat L21 ribosomal protein                                                                                                                              |
| YGL031C   | <b>Rpl24a</b> | 3                                    | Ribosomal protein L30 of the large (60S) ribosomal subunit, nearly identical to Rpl24Bp and has similarity to rat L24 ribosomal protein; not essential for translation but may be required for normal translation rate                                           |
| YGR148C   | <b>Rpl24b</b> | 3                                    | Ribosomal protein L30 of the large (60S) ribosomal subunit, nearly identical to Rpl24Ap and has similarity to rat L24 ribosomal protein; not essential for translation but may be required for normal translation rate                                           |
| YOL127W   | <b>Rpl25</b>  | 3                                    | Primary rRNA-binding ribosomal protein component of the large (60S) ribosomal subunit, has similarity to <i>E. coli</i> L23 and rat L23a ribosomal proteins; binds to 25S rRNA via a conserved C-terminal motif                                                  |
| YLR344W   | <b>Rpl26a</b> | 3                                    | Protein component of the large (60S) ribosomal subunit, nearly identical to Rpl26Bp and has similarity to <i>E. coli</i> L24 and rat L26 ribosomal proteins; binds to 5.8S rRNA                                                                                  |
| YFR031C-A | <b>Rpl2a</b>  | 3                                    | Protein component of the large (60S) ribosomal subunit, identical to Rpl2Bp and has similarity to <i>E. coli</i> L2 and rat L8 ribosomal proteins                                                                                                                |
| YIL018W   | <b>Rpl2b</b>  | 3                                    | Protein component of the large (60S) ribosomal subunit, identical to Rpl2Ap and has similarity to <i>E. coli</i> L2 and rat L8 ribosomal proteins; expression is upregulated at low temperatures                                                                 |
| YBL092W   | <b>Rpl32</b>  | 3                                    | Protein component of the large (60S) ribosomal subunit, has similarity to rat L32 ribosomal protein; overexpression disrupts telomeric silencing                                                                                                                 |
| YOR234C   | <b>Rpl33b</b> | 3                                    | Ribosomal protein L37 of the large (60S) ribosomal subunit, nearly identical to Rpl33Ap and has similarity to rat L35a; rpl33b null mutant exhibits normal growth while rpl33a rpl33b double null mutant is inviable                                             |
| YMR194W   | <b>Rpl36a</b> | 3                                    | N-terminally acetylated protein component of the large (60S) ribosomal subunit, nearly identical to Rpl36Bp and has similarity to rat L36 ribosomal protein; binds to 5.8 S rRNA                                                                                 |
| YDR012W   | <b>Rpl4b</b>  | 3                                    | Protein component of the large (60S) ribosomal subunit, nearly identical to Rpl4Ap and has similarity to <i>E. coli</i> L4 and rat L4 ribosomal proteins                                                                                                         |
| YHL033C   | <b>Rpl8a</b>  | 3                                    | Ribosomal protein L4 of the large (60S) ribosomal subunit, nearly identical to Rpl8Bp and has similarity to rat L7a ribosomal protein; mutation results in decreased amounts of free 60S subunits                                                                |
| YIL045C   | <b>Rpl8b</b>  | 3                                    | Ribosomal protein L4 of the large (60S) ribosomal subunit, nearly identical to Rpl8Ap and has similarity to rat L7a ribosomal protein; mutation results in decreased amounts of free 60S subunits                                                                |
| YER074W   | <b>Rps24a</b> | 3                                    | Protein component of the small (40S) ribosomal subunit, identical to Rps24Bp and has similarity to rat S24 ribosomal protein                                                                                                                                     |
| YIL069C   | <b>Rps24b</b> | 3                                    | Protein component of the small (40S) ribosomal subunit, identical to Rps24Ap and has similarity to rat S24 ribosomal protein                                                                                                                                     |
| YGR027C   | <b>Rps25a</b> | 3                                    | Protein component of the small (40S) ribosomal subunit, nearly identical to Rps25Bp and has similarity to rat S25 ribosomal protein                                                                                                                              |
| YLR333C   | <b>Rps25b</b> | 3                                    | Protein component of the small (40S) ribosomal subunit, nearly identical to Rps25Ap and has similarity to rat S25 ribosomal protein                                                                                                                              |
| YOR167C   | <b>Rps28a</b> | 3                                    | Protein component of the small (40S) ribosomal subunit, nearly identical to Rps28Bp and has similarity to rat S28 ribosomal protein                                                                                                                              |
| YLR264W   | <b>Rps28b</b> | 3                                    | Protein component of the small (40S) ribosomal subunit, nearly identical to Rps28Ap and has similarity to rat S28 ribosomal protein                                                                                                                              |
| YPL090C   | <b>Rps6a</b>  | 3                                    | Protein component of the small (40S) ribosomal subunit, identical to Rps6Bp and has similarity to rat S6 ribosomal protein                                                                                                                                       |
| YBR181C   | <b>Rps6b</b>  | 3                                    | Protein component of the small (40S) ribosomal subunit, identical to Rps6Ap and has similarity to rat S6 ribosomal protein                                                                                                                                       |
| YNL096C   | <b>Rps7b</b>  | 3                                    | Protein component of the small (40S) ribosomal subunit, nearly identical to Rps7Ap; interacts with Kit11p; deletion causes hypersensitivity to zymocin; has similarity to rat S7 and <i>Xenopus</i> S8 ribosomal proteins                                        |
| YHL034C   | <b>Sbp1</b>   | 3                                    | Putative RNA binding protein; involved in translational repression and found in cytoplasmic P bodies; found associated with small nucleolar RNAs snR10 and snR11                                                                                                 |
| YDR023W   | <b>Ses1</b>   | 3                                    | Cytosolic seryl-tRNA synthetase, class II aminoacyl-tRNA synthetase that aminoacylates tRNA(Ser); displays tRNA-dependent amino acid recognition which enhances discrimination of the serine substrate, interacts with peroxin Pex21p                            |
| YDL229W   | <b>Ssb1</b>   | 3                                    | Cytoplasmic ATPase that is a ribosome-associated molecular chaperone, functions with J-protein partner Zuo1p; may be involved in folding of newly-made polypeptide chains                                                                                        |
| YHR064C   | <b>Ssz1</b>   | 3                                    | Hsp70 protein that interacts with Zuo1p (a DnaJ homolog) to form a ribosome-associated complex that binds the ribosome via the Zuo1p subunit; also involved in pleiotropic drug resistance via sequential activation of PDR1 and PDR5; binds ATP                 |
| YPL237W   | <b>Sui3</b>   | 3                                    | Beta subunit of the translation initiation factor eIF2, involved in the identification of the start codon; proposed to be involved in mRNA binding                                                                                                               |
| YIL078W   | <b>Ths1</b>   | 3                                    | Threonyl-tRNA synthetase, essential cytoplasmic protein                                                                                                                                                                                                          |
| YMR260C   | <b>Tif11</b>  | 3                                    | Translation initiation factor eIF1A, essential protein that forms a complex with Sui1p (eIF1) and the 40S ribosomal subunit and scans for the start codon; C-terminus associates with Fun12p (eIF5B); N terminus interacts with eIF2 and eIF3                    |
| YKL035W   | <b>Ugp1</b>   | 3                                    | UDP-glucose pyrophosphorylase (UGPase), catalyzes the reversible formation of UDP-Glc from glucose 1-phosphate and UTP, involved in a wide variety of metabolic pathways, expression modulated by Pho85p through Pho4p                                           |
| YDL185W   | <b>Vma1</b>   | 3                                    | Subunit A of the eight-subunit V1 peripheral membrane domain of the vacuolar H <sup>+</sup> -ATPase; protein precursor undergoes self-catalyzed splicing to yield the extein T1p and the intein Vde (Pi-Sce), which is a site-specific endonuclease              |
| YBR127C   | <b>Vma2</b>   | 3                                    | Subunit B of the eight-subunit V1 peripheral membrane domain of the vacuolar H <sup>+</sup> -ATPase (V-ATPase), an electrogenic proton pump found throughout the endomembrane system; contains nucleotide binding sites                                          |
| YGR285C   | <b>Zuo1</b>   | 3                                    | Ribosome-associated chaperone, functions in ribosome biogenesis and, in partnership with Ssz1p and Ssb1/2, as a chaperone for nascent polypeptide chains                                                                                                         |



**Table S1 part D : List of proteins bound to AICAR-affinity resin at least three times on 5 independent experiments**

| ORF name  | Protein name | Fold found on AICAR-resin (5 columns) | Protein function                                                                                                                                                                                                                                |
|-----------|--------------|---------------------------------------|-------------------------------------------------------------------------------------------------------------------------------------------------------------------------------------------------------------------------------------------------|
| YAL003W   | Efb1         | 5                                     | Translation elongation factor 1 beta; stimulates nucleotide exchange to regenerate EF-1 alpha-GTP for the next elongation cycle; part of the EF-1 complex, which facilitates binding of aminoacyl-tRNA to the ribosomal A site                  |
| YLR300W   | Exg1         | 5                                     | Major exo-1,3-beta-glucanase of the cell wall, involved in cell wall beta-glucan assembly; exists as three differentially glycosylated isoenzymes                                                                                               |
| YEL034W   | Hyp2         | 5                                     | Translation elongation factor eIF-5A that may function in translation initiation; similar to and functionally redundant with Anb1p; structural homolog of bacterial EF-P; undergoes an essential hypusination modification                      |
| YLR432W   | Imd3         | 5                                     | Inosine monophosphate dehydrogenase, catalyzes the first step of GMP biosynthesis, member of a four-gene family in <i>S. cerevisiae</i> , constitutively expressed                                                                              |
| YML056C   | Imd4         | 5                                     | Inosine monophosphate dehydrogenase, catalyzes the first step of GMP biosynthesis, member of a four-gene family in <i>S. cerevisiae</i> , constitutively expressed                                                                              |
| YER165W   | Pab1         | 5                                     | Poly(A) binding protein, part of the 3'-end RNA-processing complex, mediates interactions between the 5' cap structure and the 3' mRNA poly(A) tail, involved in control of poly(A) tail length, interacts with translation factor eIF-4G       |
| YGL037C   | Pnc1         | 5                                     | Nicotinamide that converts nicotinamide to nicotinic acid as part of the NAD(+) salvage pathway, required for life span extension by calorie restriction; PNC1 expression responds to all known stimuli that extend replicative life span       |
| YOR389C   | Rps12        | 5                                     | Protein component of the small (40S) ribosomal subunit; has similarity to rat ribosomal protein S12                                                                                                                                             |
| YHL015W   | Rps20        | 5                                     | Protein component of the small (40S) ribosomal subunit; overproduction suppresses mutations affecting RNA polymerase III-dependent transcription; has similarity to <i>E. coli</i> S10 and rat S20 ribosomal proteins                           |
| YHL034C   | Sbp1         | 5                                     | Putative RNA binding protein; involved in translational repression and found in cytoplasmic P bodies; found associated with small nucleolar RNAs snR10 and snR11                                                                                |
| YDR023W   | Ses1         | 5                                     | Cytosolic seryl-tRNA synthetase, class II aminoacyl-tRNA synthetase that aminoacylates tRNA(Ser), displays tRNA-dependent amino acid recognition which enhances discrimination of the serine substrate, interacts with peroxin Pex21p           |
| YDL229W   | Ssb1         | 5                                     | Cytoplasmic ATPase that is a ribosome-associated molecular chaperone, functions with J-protein partner Zuo1p; may be involved in folding of newly-made polypeptide chains; member of the HSP70 family; interacts with phosphatase subunit Reg1p |
| YNL209W   | Ssb2         | 5                                     | Cytoplasmic ATPase that is a ribosome-associated molecular chaperone, functions with J-protein partner Zuo1p; may be involved in the folding of newly-synthesized polypeptide chains; member of the HSP70 family; homolog of SSB1               |
| YLR150W   | Stm1         | 5                                     | Protein required for optimal translation under nutrient stress; perturbs association of Yef3p with ribosomes; involved in TOR signaling; binds G4 quadruplex and purine motif triplex nucleic acid; helps maintain telomere structure           |
| YHR019C   | Ded81        | 4                                     | Cytosolic asparaginyl-tRNA synthetase, required for protein synthesis, catalyzes the specific attachment of asparagine to its cognate tRNA                                                                                                      |
| YOR133W   | Ef1f         | 4                                     | Elongation factor 2 (EF-2), also encoded by EFT2; catalyzes ribosomal translocation during protein synthesis; contains diphthamide, the unique posttranslationally modified histidine residue specifically ADP-ribosylated by diphtheria toxin  |
| YDR385W   | Ef1f2        | 4                                     | Elongation factor 2 (EF-2), also encoded by EFT1; catalyzes ribosomal translocation during protein synthesis; contains diphthamide, the unique posttranslationally modified histidine residue specifically ADP-ribosylated by diphtheria toxin  |
| YPL037C   | Egdl         | 4                                     | Subunit beta1 of the nascent polypeptide-associated complex (NAC) involved in protein targeting, associated with cytoplasmic ribosomes; enhances DNA binding of the Gal4 activator; homolog of human BTF3b                                      |
| YOL123W   | Hrp1         | 4                                     | Subunit of cleavage factor I, a five-subunit complex required for the cleavage and polyadenylation of pre-mRNA 3' ends; RRM-containing heteronuclear RNA binding protein and hnRNP A/B family member that binds to poly (A) signal sequences    |
| YLR259C   | Hsp60        | 4                                     | Tetradecameric mitochondrial chaperonin required for ATP-dependent folding of precursor polypeptides and complex assembly; prevents aggregation and mediates protein refolding after heat shock; role in mtDNA transmission; phosphorylated     |
| YDL051W   | Lhp1         | 4                                     | RNA binding protein required for maturation of tRNA and U6 snRNA precursors; acts as a molecular chaperone for RNAs transcribed by polymerase III; homologous to human La (SS-B) autoantigen                                                    |
| YDR432W   | Np3          | 4                                     | RNA binding protein required for maturation of tRNA and U6 snRNA precursors; acts as a molecular chaperone for RNAs transcribed by polymerase III; homologous to human La (SS-B) autoantigen                                                    |
| YPR102C   | Rpl11a       | 4                                     | Protein of the large 60S ribosomal subunit, nearly identical to Rpl11Bp but expressed at twice the level; involved in ribosomal assembly; depletion causes degradation of 60S proteins and RNA; similar to <i>E. coli</i> L5 and rat L11        |
| YGR085C   | Rpl11b       | 4                                     | Protein component of the large (60S) ribosomal subunit, nearly identical to Rpl11A; involved in ribosomal assembly; depletion causes degradation of proteins and RNA of the 60S subunit; has similarity to <i>E. coli</i> L5 and rat L11        |
| YGR034W   | Rpl26b       | 4                                     | Protein component of the large (60S) ribosomal subunit, nearly identical to Rpl26Ap and has similarity to <i>E. coli</i> L24 and rat L26 ribosomal proteins; binds to 5.8S rRNA                                                                 |
| YDL075W   | Rpl31a       | 4                                     | Protein component of the large (60S) ribosomal subunit, nearly identical to Rpl31Bp and has similarity to rat L31 ribosomal protein; associates with the karyopherin Sxm1p; loss of both Rpl31p and Rpl39p confers lethality                    |
| YPL131W   | Rpl5         | 4                                     | Protein component of the large (60S) ribosomal subunit with similarity to <i>E. coli</i> L18 and rat L5 ribosomal proteins; binds 5S rRNA and is required for 60S subunit assembly                                                              |
| YML024W   | Rps17a       | 4                                     | Ribosomal protein 51 (p51) of the small (40s) subunit; nearly identical to Rps17Bp and has similarity to rat S17 ribosomal protein                                                                                                              |
| YDR447C   | Rps17b       | 4                                     | Ribosomal protein 51 (p51) of the small (40s) subunit; nearly identical to Rps17Ap and has similarity to rat S17 ribosomal protein                                                                                                              |
| YOL121C   | Rps19a       | 4                                     | Protein component of the small (40S) ribosomal subunit, required for assembly and maturation of pre-40 S particles; mutations in human RPS19 are associated with Diamond Blackfan anemia; nearly identical to Rps19Bp                           |
| YNL302C   | Rps19b       | 4                                     | Protein component of the small (40S) ribosomal subunit, required for assembly and maturation of pre-40 S particles; mutations in human RPS19 are associated with Diamond Blackfan anemia; nearly identical to Rps19Ap                           |
| YNL178W   | Rps3         | 4                                     | Protein component of the small (40S) ribosomal subunit, has apurinic/apyrimidinic (AP) endonuclease activity; essential for viability; has similarity to <i>E. coli</i> S3 and rat S3 ribosomal proteins                                        |
| YJR123W   | Rps5         | 4                                     | Protein component of the small (40S) ribosomal subunit, the least basic of the non-acidic ribosomal proteins; phosphorylated in vivo; essential for viability; has similarity to <i>E. coli</i> S7 and rat S5 ribosomal proteins                |
| YBR118W   | Tef2         | 4                                     | Translational elongation factor EF-1 alpha; also encoded by TEF1; functions in the binding reaction of aminoacyl-tRNA (AA-tRNA) to ribosomes; may also have a role in tRNA re-export from the nucleus                                           |
| YIL078W   | Tfs1         | 4                                     | Threonyl-tRNA synthetase, essential cytoplasmic protein                                                                                                                                                                                         |
| YPR163C   | Tif3         | 4                                     | Translation initiation factor eIF-4B, has RNA annealing activity; contains an RNA recognition motif and binds to single-stranded RNA                                                                                                            |
| YFL039C   | Act1         | 3                                     | Actin, structural protein involved in cell polarization, endocytosis, and other cytoskeletal functions                                                                                                                                          |
| YMR116C   | Asc1         | 3                                     | G-protein beta subunit and guanine nucleotide dissociation inhibitor for Gps2p; ortholog of RACK1 that inhibits translation; core component of the small (40S) ribosomal subunit; represses Gcn4p in the absence of amino acid starvation       |
| YAL038W   | Cdc19        | 3                                     | Pyruvate kinase, functions as a homotetramer in glycolysis to convert phosphoenolpyruvate to pyruvate, the input for aerobic (TCA cycle) or anaerobic (glucose fermentation) respiration                                                        |
| YLL018C   | Dps1         | 3                                     | Aspartyl-tRNA synthetase, primarily cytoplasmic; homodimeric enzyme that catalyzes the specific aspartylation of tRNA(Asp); class II aminoacyl tRNA synthetase; binding to its own mRNA may confer autoregulation                               |
| YHR193C   | Egdl2        | 3                                     | Alpha subunit of the heteromeric nascent polypeptide-associated complex (NAC) involved in protein targeting and translocation, associated with cytoplasmic ribosomes                                                                            |
| YGR200C   | Elp2         | 3                                     | Subunit of Elongator complex, which is required for modification of wobble nucleosides in tRNA; target of Kluyveromyces lactis zymocin                                                                                                          |
| YER025W   | Gcd11        | 3                                     | Gamma subunit of the translation initiation factor eIF2; involved in the identification of the start codon; binds GTP when forming the ternary complex with GTP and tRNAi-Met                                                                   |
| YER133W   | Gic7         | 3                                     | Type 1 serine/threonine protein phosphatase catalytic subunit, involved in many processes (eg. glycogen metabolism, sporulation, mitosis); accumulates at mating projections by interaction with Afr1p; interacts with many regulatory subunits |
| YMR186W   | Hsc82        | 3                                     | Cytoplasmic chaperone of the Hsp90 family, redundant in function and nearly identical with Hsp82p, and together they are essential; expressed constitutively at 10-fold higher basal levels than HSP82 and induced 2-3 fold by heat shock       |
| YPL240C   | Hsp82        | 3                                     | Hsp90 chaperone required for pheromone signaling and negative regulation of Hsf1p; docks with Tom70p for mitochondrial preprotein delivery; promotes telomerase DNA binding and nucleotide addition; interacts with Cns1p, Cpr6p, Cpr7p, Stt1p  |
| YDR037W   | Krs1         | 3                                     | Lvsiv-tRNA synthetase                                                                                                                                                                                                                           |
| YPL004C   | Lsp1         | 3                                     | Primary component of eisosomes, which are large immobile patch structures at the cell cortex associated with endocytosis, along with Pil1p and Sur7p                                                                                            |
| YLR044C   | Pdc1         | 3                                     | Major of three pyruvate decarboxylase isozymes, key enzyme in alcoholic fermentation, decarboxylates pyruvate to acetaldehyde; subject to glucose-, ethanol-, and autoregulation; involved in amino acid catabolism                             |
| YLR406C   | Rpl31b       | 3                                     | Protein component of the large (60S) ribosomal subunit, nearly identical to Rpl31Ap and has similarity to rat L31 ribosomal protein; associates with the karyopherin Sxm1p; loss of both Rpl31p and Rpl39p confers lethality                    |
| YLR448W   | Rpl6b        | 3                                     | Protein component of the large (60S) ribosomal subunit, has similarity to Rpl6Ap and to rat L6 ribosomal protein; binds to 5.8S rRNA                                                                                                            |
| YOL039W   | Rpp2a        | 3                                     | Ribosomal protein P2 alpha, a component of the ribosomal stalk, which is involved in the interaction between translational elongation factors and the ribosome; regulates the accumulation of P1 (Rpp1Ap and Rpp1Bp) in the cytoplasm           |
| YDR382W   | Rpp2b        | 3                                     | Ribosomal protein P2 beta, a component of the ribosomal stalk, which is involved in the interaction between translational elongation factors and the ribosome; regulates the accumulation of P1 (Rpp1Ap and Rpp1Bp) in the cytoplasm            |
| YGR214W   | Rps0a        | 3                                     | Protein component of the small (40S) ribosomal subunit, nearly identical to Rps0Bp; required for maturation of 18S rRNA along with Rps0Bp; deletion of either RPS0 gene reduces growth rate, deletion of both genes is lethal                   |
| YLR048W   | Rps0b        | 3                                     | Protein component of the small (40S) ribosomal subunit, nearly identical to Rps0Ap; required for maturation of 18S rRNA along with Rps0Ap; deletion of either RPS0 gene reduces growth rate, deletion of both genes is lethal                   |
| YOR167C   | Rps28a       | 3                                     | Protein component of the small (40S) ribosomal subunit; nearly identical to Rps28Bp and has similarity to rat S28 ribosomal protein                                                                                                             |
| YLR264W   | Rps28b       | 3                                     | Protein component of the small (40S) ribosomal subunit; nearly identical to Rps28Ap and has similarity to rat S28 ribosomal protein                                                                                                             |
| YPR181C   | Sec23        | 3                                     | GTPase-activating protein, stimulates the GTPase activity of Sar1p; component of the Sec23p-Sec24p heterodimer of the COPII vesicle coat, involved in ER to Golgi transport                                                                     |
| YLL024C   | Ssa2         | 3                                     | ATP binding protein involved in protein folding and vacuolar import of proteins; member of heat shock protein 70 (HSP70) family                                                                                                                 |
| YJR007W   | Sui2         | 3                                     | Alpha subunit of the translation initiation factor eIF2, involved in the identification of the start codon; phosphorylation of Ser51 is required for regulation of translation by inhibiting the exchange of GDP for GTP                        |
| YJR009C   | Tdh2         | 3                                     | Glyceraldehyde-3-phosphate dehydrogenase, isozyme 2, involved in glycolysis and gluconeogenesis; tetramer that catalyzes the reaction of glyceraldehyde-3-phosphate to 1,3 bis-phosphoglycerate; detected in the cytoplasm and cell wall        |
| YGR182C   | Tdh3         | 3                                     | Glyceraldehyde-3-phosphate dehydrogenase, isozyme 3, involved in glycolysis and gluconeogenesis; tetramer that catalyzes the reaction of glyceraldehyde-3-phosphate to 1,3 bis-phosphoglycerate; detected in the cytoplasm and cell wall        |
| YPR080W   | Tef1         | 3                                     | Translational elongation factor EF-1 alpha; also encoded by TEF2; functions in the binding reaction of aminoacyl-tRNA (AA-tRNA) to ribosomes; may also have a role in tRNA re-export from the nucleus                                           |
| YKR050W   | Tif1         | 3                                     | Translation initiation factor eIF4A, identical to Tif2p; DEA(DH)-box RNA helicase that couples ATPase activity to RNA binding and unwinding; forms a dumbbell structure of two compact domains connected by a linker; interacts with eIF4G      |
| YIL138C   | Tif2         | 3                                     | Translation initiation factor eIF4A, identical to Tif1p; DEA(DH)-box RNA helicase that couples ATPase activity to RNA binding and unwinding; forms a dumbbell structure of two compact domains connected by a linker; interacts with eIF4G      |
| YLR262C-A | Tma7         | 3                                     | Protein of unknown that associates with ribosomes; null mutant exhibits translation defects, altered polyribosome profiles, and resistance to the translation inhibitor anisomycin                                                              |
| YDL185W   | Vma1         | 3                                     | Subunit A of the eight-subunit V1 peripheral membrane domain of the vacuolar H+-ATPase; protein precursor undergoes self-catalyzed splicing to yield the extein Tlp1p and the intein Vde (Pi-Scel), which is a site-specific endonuclease       |
| YLR249W   | Yef3         | 3                                     | Gamma subunit of translational elongation factor eEF1B, stimulates the binding of aminoacyl-tRNA (AA-tRNA) to ribosomes by releasing eEF1A (Tef1p/Tef2p) from the ribosomal complex; contains two ABC cassettes; binds and hydrolyzes ATP       |
| YHR020W   | Yhr020w      | 3                                     | Protein of unknown function that may interact with ribosomes, based on co-purification experiments; has similarity to proline-RNA ligase; YHR020W is an essential gene                                                                          |

**Table S2: List of the 57 proteins less abundant in the presence of AICAR**

| Protein Name | Protein Function                                                          | Mean abundance + AICAR | Mean abundance - AICAR | Ratio + vs - AICAR | T-test p-value + vs - AICAR |
|--------------|---------------------------------------------------------------------------|------------------------|------------------------|--------------------|-----------------------------|
| Btn2         | v-SNARE binding protein                                                   | 5.5E+05                | 2.7E+06                | 0.20               | 0.010                       |
| Crz1         | Transcription factor                                                      | 8.3E+05                | 3.3E+06                | 0.25               | 0.043                       |
| <b>Snu13</b> | RNA binding protein; part of U3 snoRNP                                    | 2.8E+06                | 1.1E+07                | 0.25               | 0.022                       |
| <b>Hhf1</b>  | Histone H4                                                                | 5.2E+07                | 2.0E+08                | 0.26               | 0.041                       |
| Srp40        | Role in preribosome assembly or transport                                 | 4.5E+06                | 1.7E+07                | 0.26               | 0.029                       |
| Htb2         | Histone H2B                                                               | 2.0E+06                | 7.8E+06                | 0.26               | 0.004                       |
| Dep1         | Component of the Rpd3L histone deacetylase complex                        | 4.3E+05                | 1.6E+06                | 0.28               | 0.002                       |
| Isw1         | ATPase subunit of imitation-switch chromatin remodelers                   | 2.5E+06                | 8.2E+06                | 0.31               | 0.012                       |
| <b>Htz1</b>  | Histone variant H2AZ                                                      | 9.8E+06                | 3.1E+07                | 0.31               | 0.022                       |
| <b>Rpc31</b> | RNA polymerase III largest subunit C160                                   | 1.1E+05                | 3.6E+05                | 0.32               | 0.035                       |
| Abf1         | DNA binding protein with possible chromatin-reorganizing activity         | 6.0E+06                | 1.9E+07                | 0.32               | 0.034                       |
| Spc110       | Inner plaque spindle pole body (SPB) component                            | 3.2E+06                | 9.9E+06                | 0.32               | 0.046                       |
| <b>Hta1</b>  | Histone H2A                                                               | 2.2E+08                | 6.6E+08                | 0.33               | 0.006                       |
| Pho2         | Homeobox transcription factor                                             | 7.7E+05                | 2.3E+06                | 0.33               | 0.012                       |
| Imp2'        | Transcriptional activator                                                 | 5.4E+04                | 1.6E+05                | 0.34               | 0.013                       |
| <b>Hht1</b>  | Histone H3                                                                | 1.5E+07                | 4.4E+07                | 0.34               | 0.031                       |
| Tub4         | Gamma-tubulin                                                             | 3.4E+05                | 9.9E+05                | 0.34               | 0.035                       |
| <b>Mcr1</b>  | NADH-cytochrome b5 reductase                                              | 2.1E+06                | 6.0E+06                | 0.35               | 0.040                       |
| Srm1         | Nucleotide exchange factor for Gsp1p                                      | 1.3E+07                | 3.8E+07                | 0.35               | 0.018                       |
| Nit2         | Nit protein                                                               | 2.9E+05                | 8.1E+05                | 0.35               | 0.031                       |
| Tfa1         | TFIIE large subunit                                                       | 2.4E+06                | 6.9E+06                | 0.35               | 0.037                       |
| Hho1         | Histone H1                                                                | 7.5E+06                | 2.0E+07                | 0.37               | 0.046                       |
| Pxr1         | Essential protein involved in rRNA and snoRNA maturation                  | 7.4E+06                | 2.0E+07                | 0.37               | 0.009                       |
| Mot1         | Essential protein involved in regulation of transcription                 | 9.7E+07                | 2.5E+08                | 0.39               | 0.023                       |
| Taf7         | TFIID subunit involved in RNA polymerase II transcription                 | 3.8E+06                | 9.7E+06                | 0.39               | 0.010                       |
| Raf1         | Anti-repressor that increases 2 micron plasmid copy number                | 3.1E+06                | 8.0E+06                | 0.39               | 0.010                       |
| Ylr455w      | Component of the NuA3b histone acetyltransferase complex                  | 2.9E+06                | 7.4E+06                | 0.40               | 0.008                       |
| Nop8         | Nucleolar protein required for 60S ribosomal subunit biogenesis           | 3.0E+05                | 7.4E+05                | 0.40               | 0.049                       |
| <b>Mpp10</b> | Component of the SSU processome and 90S preribosome                       | 9.3E+05                | 2.3E+06                | 0.40               | 0.004                       |
| <b>Rpb4</b>  | RNA polymerase II subunit B32                                             | 1.3E+06                | 3.3E+06                | 0.41               | 0.007                       |
| <b>Rep2</b>  | Master regulator that regulates transcript levels of the FLP1 gene        | 8.0E+06                | 1.9E+07                | 0.41               | 0.009                       |
| Rpc34        | RNA polymerase III subunit C34                                            | 2.0E+06                | 4.9E+06                | 0.42               | 0.040                       |
| Gcg1         | Gamma-glutamyl cyclotransferase                                           | 3.4E+06                | 8.0E+06                | 0.42               | 0.005                       |
| Arp5         | Nuclear actin-related protein involved in chromatin remodeling            | 2.7E+06                | 6.4E+06                | 0.43               | 0.016                       |
| <b>Rap1</b>  | DNA-binding protein involved in regulation of transcription               | 6.9E+06                | 1.6E+07                | 0.43               | 0.020                       |
| <b>Nop56</b> | Essential nucleolar protein                                               | 1.2E+08                | 2.9E+08                | 0.43               | 0.014                       |
| <b>Scp1</b>  | Component of yeast cortical actin cytoskeleton                            | 7.1E+05                | 1.6E+06                | 0.43               | 0.024                       |
| <b>Fpr3</b>  | Nucleolar peptidyl-prolyl cis-trans isomerase (PPIase)                    | 5.2E+07                | 1.2E+08                | 0.44               | 0.009                       |
| Rpc82        | RNA polymerase III subunit C82                                            | 3.9E+06                | 8.8E+06                | 0.44               | 0.011                       |
| Tfc3         | Subunit of the RNA polymerase III transcription initiation factor complex | 2.6E+06                | 5.8E+06                | 0.45               | 0.007                       |
| Tfg2         | TFIIF (Transcription Factor II) middle subunit                            | 1.0E+06                | 2.3E+06                | 0.46               | 0.017                       |
| <b>Nop7</b>  | Nucleolar protein involved in rRNA processing                             | 3.3E+06                | 7.3E+06                | 0.46               | 0.012                       |
| Esf2         | Essential nucleolar protein involved in pre-18S rRNA processing           | 5.0E+05                | 1.1E+06                | 0.46               | 0.046                       |
| <b>Nop6</b>  | rRNA-binding protein required for 40S ribosomal subunit biogenesis        | 4.4E+06                | 9.5E+06                | 0.46               | 0.008                       |
| Itc1         | Subunit of the ATP-dependent Isw2p-Itc1p chromatin remodeling complex     | 3.3E+06                | 7.2E+06                | 0.46               | 0.021                       |
| Rpc25        | RNA polymerase III subunit C25                                            | 1.6E+06                | 3.4E+06                | 0.47               | 0.010                       |
| Bdf1         | Protein involved in transcription initiation at TATA-containing promoters | 3.6E+06                | 7.8E+06                | 0.47               | 0.033                       |
| Rcm1         | rRNA m5C methyltransferase                                                | 5.9E+05                | 1.2E+06                | 0.47               | 0.028                       |
| Rxt3         | Subunit of the RPD3L complex                                              | 1.1E+06                | 2.3E+06                | 0.47               | 0.012                       |
| Mip1         | Catalytic subunit of the mitochondrial DNA polymerase                     | 6.2E+05                | 1.3E+06                | 0.47               | 0.013                       |
| Cyc2         | Mitochondrial peripheral inner membrane protein                           | 5.3E+05                | 1.1E+06                | 0.48               | 0.032                       |
| Sen1         | Helicase required for RNA polymerase II transcription                     | 2.1E+06                | 4.3E+06                | 0.49               | 0.015                       |
| Arp4         | Nuclear actin-related protein involved in chromatin remodeling            | 9.0E+06                | 1.8E+07                | 0.49               | 0.011                       |
| Rpa49        | RNA polymerase I subunit A49                                              | 9.9E+06                | 2.0E+07                | 0.49               | 0.038                       |
| <b>Noc2</b>  | Protein that forms a nucleolar complex with Mak21p                        | 4.4E+06                | 9.1E+06                | 0.49               | 0.010                       |
| Rgd1         | GTPase-activating protein for Rho3p and Rho4p,                            | 1.9E+06                | 3.9E+06                | 0.50               | 0.006                       |
| Swc4         | Component of the Swr1p complex                                            | 1.1E+06                | 2.2E+06                | 0.50               | 0.002                       |

**Table S3: GO term analyses for the 57 proteins less abundant in the presence of AICAR**

**Biological process**

|                                    | <b>Fold Enrichment</b> | <b>p-Value</b> |
|------------------------------------|------------------------|----------------|
| Chromatin assembly                 | 16.07                  | 8.15E-05       |
| Chromatin organization             | 7.04                   | 2.05E-07       |
| rRNA metabolic process             | 5.91                   | 1.22E-04       |
| Transcription, DNA-templated       | 5.67                   | 5.73E-10       |
| Regulation of biosynthetic process | 3.6                    | 7.75E-06       |

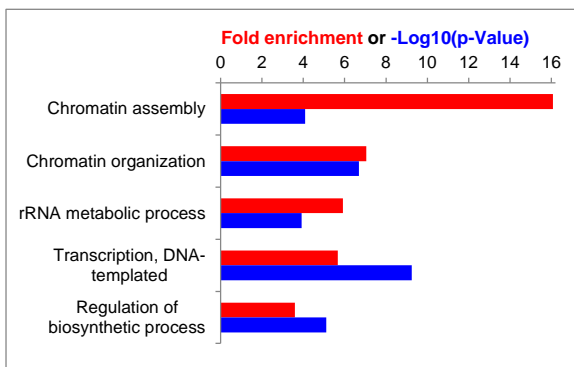

**Cellular component**

|                    | <b>Fold Enrichment</b> | <b>p-Value</b> |
|--------------------|------------------------|----------------|
| Nuclear nucleosome | 100                    | 5.03E-10       |
| Nuclear chromatin  | 13.73                  | 9.31E-11       |
| Nuclear chromosome | 6.97                   | 7.16E-08       |
| Nuclear lumen      | 5.9                    | 1.98E-20       |
| Nucleolus          | 5.55                   | 7.70E-04       |

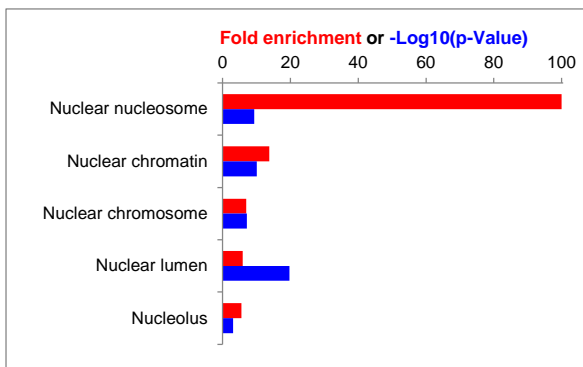

**Table S4: List of the 92 proteins more abundant when Kap123 is overexpressed**

| Protein Name | Protein Function                                                      | Mean abundance + AICAR | Mean abundance - AICAR | Ratio + vs - AICAR | T-test p-value + vs - AICAR |
|--------------|-----------------------------------------------------------------------|------------------------|------------------------|--------------------|-----------------------------|
| Tkl2         | Transketolase                                                         | 2.40E+06               | 4.57E+05               | 5.25               | 0.024                       |
| Mcm2         | Protein involved in DNA replication                                   | 1.89E+06               | 4.16E+05               | 4.53               | 0.044                       |
| Vps72        | Htz1p-binding component of the SWR1 complex                           | 7.31E+05               | 1.65E+05               | 4.42               | 0.048                       |
| Tfc6         | Subunit of RNA polymerase III transcription initiation factor complex | 2.29E+06               | 5.43E+05               | 4.21               | 0.025                       |
| Lam1         | Putative sterol transfer protein                                      | 4.00E+05               | 1.03E+05               | 3.87               | 0.026                       |
| Vps1         | Dynamamin-like GTPase                                                 | 1.80E+08               | 4.67E+07               | 3.86               | 0.034                       |
| Orc2         | Subunit of the origin recognition complex,                            | 6.97E+05               | 1.91E+05               | 3.65               | 0.039                       |
| Htz1         | Histone variant H2AZ                                                  | 3.52E+07               | 9.79E+06               | 3.59               | 0.049                       |
| Rtg3         | Basic helix-loop-helix-leucine zipper transcription factor            | 5.45E+06               | 1.53E+06               | 3.56               | 0.044                       |
| Urb2         | Protein required for metabolism of the rRNA primary transcript        | 5.01E+05               | 1.42E+05               | 3.53               | 0.047                       |
| Elc1         | Elongin C                                                             | 1.33E+06               | 3.79E+05               | 3.51               | 0.027                       |
| Htb2         | Histone H2B                                                           | 4.69E+06               | 1.36E+06               | 3.45               | 0.032                       |
| Pop1         | Subunit of both RNase MRP and nuclear RNase P                         | 3.34E+06               | 9.86E+05               | 3.39               | 0.039                       |
| Hos3         | Trichostatin A-insensitive homodimeric histone deacetylase            | 9.85E+06               | 2.92E+06               | 3.37               | 0.022                       |
| Ams1         | Vacuolar alpha mannosidase                                            | 1.16E+06               | 3.53E+05               | 3.27               | 0.047                       |
| Rod1         | Alpha-arrestin involved in ubiquitin-dependent endocytosis            | 1.00E+06               | 3.14E+05               | 3.20               | 0.014                       |
| lsw1         | ATPase subunit of imitation-switch chromatin remodelers               | 9.98E+06               | 3.13E+06               | 3.19               | 0.050                       |
| Hsp30        | Negative regulator of the H(+)-ATPase Pma1p                           | 2.50E+07               | 8.15E+06               | 3.06               | 0.017                       |
| Yaf9         | Subunit of NuA4 histone H4 acetyltransferase and SWR1 complexes       | 1.53E+06               | 5.01E+05               | 3.05               | 0.019                       |
| Noc3         | Subunit of the nuclear Noc2p complex and pre-replicative complexes    | 7.98E+06               | 2.62E+06               | 3.04               | 0.014                       |
| Uls1         | Swi2/Snf2-related translocase, SUMO-Targeted Ubiquitin Ligase         | 3.50E+05               | 1.18E+05               | 2.96               | 0.001                       |
| Epl1         | Subunit of NuA4, histone H4/H2A acetyltransferase complex             | 2.62E+06               | 8.89E+05               | 2.95               | 0.033                       |
| Hfi1         | Adaptor protein required for structural integrity of the SAGA complex | 1.55E+06               | 5.28E+05               | 2.94               | 0.002                       |
| Tfc4         | Subunit of RNA polymerase III transcription initiation factor complex | 1.22E+06               | 4.17E+05               | 2.92               | 0.013                       |
| Ask10        | Component of RNA polymerase II holoenzyme                             | 4.23E+06               | 1.52E+06               | 2.78               | 0.017                       |
| Lsp1         | Primary component of eisosomes                                        | 4.70E+08               | 1.70E+08               | 2.76               | 0.015                       |
| Swc4         | Component of the Swr1p complex                                        | 3.82E+06               | 1.40E+06               | 2.72               | 0.000                       |
| Pde1         | Low-affinity cyclic AMP phosphodiesterase                             | 1.24E+06               | 4.57E+05               | 2.72               | 0.016                       |
| Rap1         | DNA-binding protein involved in regulation of transcription           | 1.52E+07               | 5.66E+06               | 2.69               | 0.011                       |
| Pdc2         | Transcription factor required for synthesis of pyruvate decarboxylase | 1.44E+06               | 5.39E+05               | 2.67               | 0.022                       |
| Pma1         | Plasma membrane H+-ATPase                                             | 3.14E+07               | 1.18E+07               | 2.66               | 0.046                       |
| Sds3         | Component of the Rpd3p/Sin3p deacetylase complex                      | 1.19E+06               | 4.50E+05               | 2.64               | 0.023                       |
| Nde1         | Mitochondrial external NADH dehydrogenase,                            | 2.27E+06               | 8.64E+05               | 2.63               | 0.026                       |
| Dbp10        | Putative ATP-dependent RNA helicase                                   | 3.39E+06               | 1.30E+06               | 2.61               | 0.047                       |
| Rad7         | Nucleotide excision repair (NER) protein                              | 2.69E+06               | 1.05E+06               | 2.56               | 0.042                       |
| Mec1         | Genome integrity checkpoint protein, PI kinase superfamily member     | 4.21E+05               | 1.66E+05               | 2.53               | 0.024                       |
| Eaf1         | Component of the NuA4 histone acetyltransferase complex               | 2.24E+06               | 8.96E+05               | 2.50               | 0.026                       |
| Fpr4         | Peptidyl-prolyl cis-trans isomerase                                   | 7.31E+07               | 2.93E+07               | 2.49               | 0.008                       |
| Gph1         | Non-essential glycogen phosphorylase                                  | 8.88E+06               | 3.58E+06               | 2.48               | 0.008                       |
| Arp5         | Nuclear actin-related protein involved in chromatin remodeling        | 9.55E+06               | 3.87E+06               | 2.47               | 0.014                       |
| Spc110       | Inner plaque spindle pole body (SPB) component                        | 3.80E+06               | 1.54E+06               | 2.46               | 0.019                       |
| Suv3         | ATP-dependent RNA helicase                                            | 1.57E+06               | 6.38E+05               | 2.46               | 0.009                       |
| Hxk1         | Hexokinase isoenzyme 1                                                | 7.55E+05               | 3.09E+05               | 2.45               | 0.008                       |
| Mot1         | Essential abundant protein involved in regulation of transcription    | 6.78E+06               | 2.79E+06               | 2.43               | 0.009                       |
| Ctt1         | Cytosolic catalase T                                                  | 9.20E+06               | 3.79E+06               | 2.43               | 0.001                       |
| Ykl023w      | Putative protein of unknown function                                  | 5.93E+06               | 2.47E+06               | 2.40               | 0.030                       |
| Mak5         | Essential nucleolar protein; putative DEAD-box RNA helicase           | 1.28E+06               | 5.34E+05               | 2.39               | 0.005                       |
| Ald3         | Cytoplasmic aldehyde dehydrogenase                                    | 2.38E+07               | 9.98E+06               | 2.38               | 0.045                       |
| Top1         | Topoisomerase I                                                       | 1.95E+07               | 8.24E+06               | 2.36               | 0.040                       |
| Arp4         | Nuclear actin-related protein involved in chromatin remodeling        | 2.22E+07               | 9.41E+06               | 2.36               | 0.016                       |
| Fpr3         | Nucleolar peptidyl-prolyl cis-trans isomerase                         | 3.10E+08               | 1.32E+08               | 2.35               | 0.038                       |
| Ppn1         | Dual endo- and exopolyphosphatase                                     | 1.06E+07               | 4.54E+06               | 2.35               | 0.017                       |
| Sen1         | ATP-dependent 5' to 3' RNA/DNA and DNA helicase                       | 6.88E+06               | 3.00E+06               | 2.29               | 0.021                       |
| Rgc1         | Putative regulator of the Fps1p glycerol channel                      | 1.17E+07               | 5.12E+06               | 2.28               | 0.034                       |
| Chs1         | Chitin synthase I                                                     | 6.31E+05               | 2.77E+05               | 2.28               | 0.045                       |
| Chd1         | Nucleosome remodeling factor                                          | 1.66E+07               | 7.28E+06               | 2.27               | 0.005                       |
| Pil1         | Primary component of eisosomes                                        | 7.23E+08               | 3.19E+08               | 2.27               | 0.006                       |
| Sin3         | Component of the Sin3p-Rpd3p histone deacetylase complex              | 5.13E+06               | 2.27E+06               | 2.26               | 0.004                       |
| Pet127       | Protein with a role in 5'-end processing of mitochondrial RNAs        | 4.60E+06               | 2.05E+06               | 2.24               | 0.030                       |
| Nqm1         | Transaldolase of unknown function                                     | 1.92E+06               | 8.61E+05               | 2.23               | 0.001                       |
| Ssa4         | Heat shock protein                                                    | 3.06E+06               | 1.38E+06               | 2.22               | 0.020                       |
| Reb1         | RNA polymerase I enhancer binding protein                             | 8.98E+06               | 4.05E+06               | 2.22               | 0.015                       |
| Mss116       | Mitochondrial transcription elongation factor                         | 1.80E+07               | 8.11E+06               | 2.22               | 0.020                       |
| Mpd1         | Member of the protein disulfide isomerase (PDI) family                | 3.95E+07               | 1.79E+07               | 2.21               | 0.023                       |
| Ino80        | ATPase and nucleosome spacing factor                                  | 1.91E+07               | 8.65E+06               | 2.21               | 0.007                       |
| Mpp10        | Component of the SSU processome and 90S preribosome                   | 1.81E+06               | 8.24E+05               | 2.20               | 0.013                       |
| Spt5         | Regulator of Pol I and Pol II transcription and pre-mRNA processing   | 1.08E+07               | 4.92E+06               | 2.19               | 0.048                       |
| Nop1         | Nucleolar component of the small subunit processome complex           | 2.78E+08               | 1.27E+08               | 2.18               | 0.015                       |
| Noc2         | Protein involved in ribosome biogenesis                               | 3.50E+07               | 1.60E+07               | 2.18               | 0.011                       |
| Dss1         | 3'-5' exoribonuclease                                                 | 2.58E+06               | 1.19E+06               | 2.17               | 0.001                       |
| Slh1         | Putative RNA helicase related to Ski2p                                | 1.08E+06               | 5.02E+05               | 2.16               | 0.032                       |
| Pmt1         | Protein O-mannosyltransferase                                         | 1.11E+06               | 5.24E+05               | 2.11               | 0.005                       |
| Enp1         | Protein associated with U3 and U14 snoRNAs                            | 4.15E+06               | 1.96E+06               | 2.11               | 0.018                       |
| Set2         | Histone methyltransferase with a role in transcriptional elongation   | 6.86E+05               | 3.25E+05               | 2.11               | 0.036                       |
| Hsp31        | Methylglyoxalase that converts methylglyoxal to D-lactate             | 5.74E+06               | 2.72E+06               | 2.11               | 0.006                       |
| Itc1         | Subunit of the lsw2p-Itc1p chromatin remodeling complex               | 1.03E+07               | 4.88E+06               | 2.11               | 0.027                       |
| Tfc7         | Subunit of RNA polymerase III transcription initiation factor complex | 8.07E+06               | 3.85E+06               | 2.09               | 0.001                       |
| Nhp2         | Nuclear protein essential for function of H/ACA-type snoRNPs          | 7.79E+07               | 3.73E+07               | 2.09               | 0.011                       |

**Table S4 (continued)**

| <b>Protein Name</b> | <b>Protein Function</b>                                         | <b>Mean abundance + AICAR</b> | <b>Mean abundance - AICAR</b> | <b>Ratio + vs - AICAR</b> | <b>T-test p-value + vs - AICAR</b> |
|---------------------|-----------------------------------------------------------------|-------------------------------|-------------------------------|---------------------------|------------------------------------|
| Rqc2                | Component of RQC, which mediates nascent chain degradation      | 1.67E+07                      | 8.01E+06                      | 2.09                      | 0.018                              |
| Mdj1                | Co-chaperone stimulating the ATPase activity of Ssc1p           | 3.60E+06                      | 1.73E+06                      | 2.08                      | 0.028                              |
| Nop58               | Protein involved in pre-rRNA processing                         | 1.20E+08                      | 5.78E+07                      | 2.08                      | 0.050                              |
| Nop8                | Nucleolar protein required for 60S ribosomal subunit biogenesis | 9.76E+05                      | 4.74E+05                      | 2.06                      | 0.013                              |
| Rpb2                | RNA polymerase II second largest subunit B150                   | 7.68E+06                      | 3.73E+06                      | 2.06                      | 0.008                              |
| Kog1                | Subunit of TORC1                                                | 1.45E+06                      | 7.09E+05                      | 2.05                      | 0.007                              |
| Yfr006w             | Putative X-Pro aminopeptidase                                   | 8.73E+06                      | 4.26E+06                      | 2.05                      | 0.048                              |
| Gcy1                | Putative NADP(+) coupled glycerol dehydrogenase                 | 1.61E+06                      | 7.89E+05                      | 2.04                      | 0.021                              |
| Top2                | Topoisomerase II                                                | 4.73E+07                      | 2.33E+07                      | 2.03                      | 0.012                              |
| Rvb1                | ATP-dependent DNA helicase                                      | 7.53E+07                      | 3.72E+07                      | 2.03                      | 0.015                              |
| Kre33               | Protein required for biogenesis of the small ribosomal subunit  | 1.61E+07                      | 7.96E+06                      | 2.02                      | 0.008                              |
| Tdh1                | Glyceraldehyde-3-phosphate dehydrogenase                        | 1.28E+08                      | 6.36E+07                      | 2.02                      | 0.012                              |
| Ssf1                | Constituent of 66S pre-ribosomal particles                      | 5.36E+06                      | 2.66E+06                      | 2.01                      | 0.047                              |
| Tra1                | Subunit of SAGA and NuA4 histone acetyltransferase complexes    | 3.72E+06                      | 1.86E+06                      | 2.00                      | 0.013                              |

**Table S5: GO term analyses for the 92 proteins more abundant when Kap123 is overexpressed**

**Biological process**

|                                      | <b>Fold Enrichment</b> | <b>p-Value</b> |
|--------------------------------------|------------------------|----------------|
| Histone exchange                     | 25.27                  | 4.38E-03       |
| Regulation of chromatin organization | 14.15                  | 1.73E-03       |
| Chromatin assembly                   | 9.8                    | 9.26E-04       |
| Histone modification                 | 9.13                   | 5.63E-08       |
| Chromatin organization               | 6.57                   | 1.37E-13       |
| Transcription, DNA-templated         | 4.1                    | 1.74E-09       |
| Regulation of gene expression        | 3.02                   | 2.07E-08       |

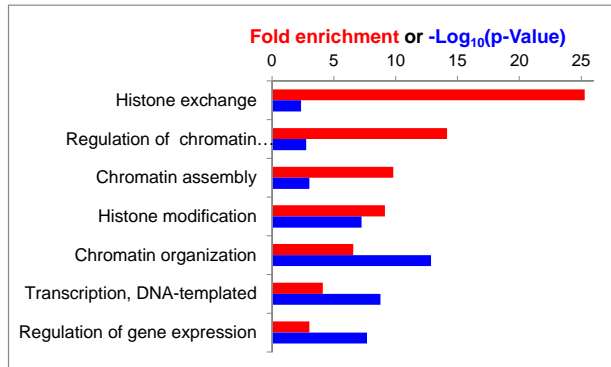

**Cellular component**

|                                        | <b>Fold Enrichment</b> | <b>p-Value</b> |
|----------------------------------------|------------------------|----------------|
| NuA4 histone acetyltransferase complex | 26.06                  | 8.86E-06       |
| INO80-type complex                     | 19.05                  | 7.35E-05       |
| Swi-SNF-type complex                   | 10.79                  | 1.27E-04       |
| Nuclear chromatin                      | 6.87                   | 2.97E-07       |
| Nuclear chromosome                     | 4.77                   | 5.49E-07       |
| Nucleolus                              | 4.62                   | 1.61E-05       |
| Nuclear lumen                          | 3.87                   | 1.13E-14       |

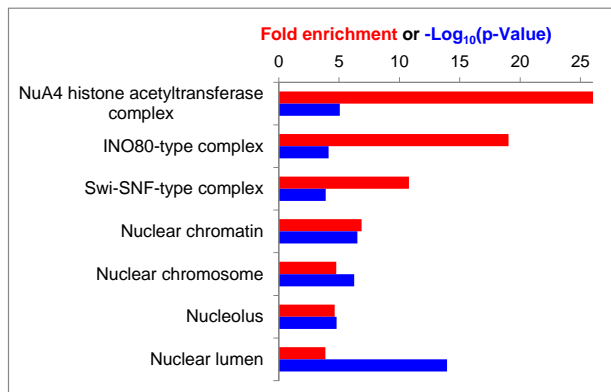

**Table S6 : Yeast strains used in this study**

| <b>Strain Name</b> | <b>Genotype</b>                                                                                                        |
|--------------------|------------------------------------------------------------------------------------------------------------------------|
| BY4741             | <i>MATa his3Δ1 leu2Δ0 ura3Δ0 lys2Δ0</i>                                                                                |
| BY4742             | <i>MATalpha his3Δ1 leu2Δ0 ura3Δ0 lys2Δ0</i>                                                                            |
| Y1162              | <i>MATalpha ade16::KanMX4 ade17::KanMX4 his3Δ1 leu2Δ0 ura3Δ0 lys2Δ0</i>                                                |
| Y2950              | <i>MATalpha ade16::KanMX4 ade17::KanMX4 ade8::KanMX4 his1::KanMX4 his3Δ1 leu2Δ0 ura3Δ0</i>                             |
| Y3655              | <i>MATa fum1::LEU2 ade16::KanMX4 ade17::KanMX4 ade8::KanMX4 his1::KanMX4 his3Δ1 leu2Δ0 ura3Δ0</i>                      |
| Y6986              | <i>MATalpha ade16::KanMX4 ade17::KanMX4 ade8::KanMX4 his1::KanMX4 his3Δ1::HIS3-LEU2 leu2Δ0 ura3Δ0</i>                  |
| Y7321              | <i>MATalpha thi3 (S402F) ade16::kanMX4 ade17::kanMX4 ade8::kanMX4 his1::kanMX4 his3 Δ 1::HIS3-LEU2 leu2Δ0 ura3 Δ 0</i> |
| Y8480              | <i>MATa ade16::KanMX4 ade17::KanMX4 ade8::KanMX4 his1::KanMX4 his3Δ1 leu2Δ0 ura3Δ0</i>                                 |
| Y8908              | <i>MATa ade3::KanMX4 ade16::KanMX4 ade17::KanMX4 ade8::KanMX4 his1::KanMX4 his3Δ1 leu2Δ0 ura3Δ0</i>                    |
| Y9082              | <i>MATa bre1:: KanMX4 ade16::KanMX4 ade17::KanMX4 ade8::KanMX4 his1::KanMX4 his3Δ1 leu2Δ0 ura3Δ0</i>                   |
| Y9168              | <i>MATalpha set1::KanMX4 ade16::KanMX4 ade17::KanMX4 ade8::KanMX4 his1::KanMX4 his3Δ1 leu2Δ0 ura3Δ0 met15Δ0</i>        |
| Y9479              | <i>MATalpha swd1::KanMX4 ade16::KanMX4 ade17::KanMX4 ade8::KanMX4 his1::KanMX4 his3Δ1 leu2Δ0 ura3Δ0 lys2Δ0</i>         |
| Y9480              | <i>MATalpha swd3::KanMX4 ade16::KanMX4 ade17::KanMX4 ade8::KanMX4 his1::KanMX4 his3Δ1 leu2Δ0 ura3Δ0 lys2Δ0</i>         |
| Y9623              | <i>MATalpha kap123::KanMX4 ade16::KanMX4 ade17::KanMX4 his3Δ1 leu2Δ0 ura3Δ0</i>                                        |
| Y9715              | <i>MATalpha ynk1::KanMX4 ade16::KanMX4 ade17::KanMX4 his3Δ1 leu2Δ0 ura3Δ0</i>                                          |
| Y10846             | <i>MATa ade16::KanMX4 ade17::KanMX4 aah1::KanMX4 his3Δ1 leu2Δ0 ura3Δ0</i>                                              |
| Y10867             | <i>MATa snf4::KanMX4 ade16::KanMX4 ade17::KanMX4 ade8::KanMX4 his1::KanMX4 his3Δ1 leu2Δ0 ura3Δ0</i>                    |
| Y10422             | <i>MATalpha ade13::URA3 ade16::KanMX4 ade17::KanMX4 ade8::KanMX4 his1::KanMX4 his3Δ1 leu2Δ0 ura3Δ0</i>                 |

**Table S7: Plasmids used in this study**

| <b>Plasmid Name</b>           | <b>Relevant criteria</b>                                      | <b>Source</b>  |
|-------------------------------|---------------------------------------------------------------|----------------|
| pCM189                        | <i>tetO<sub>7</sub> promoter CEN ARS URA3 Amp<sup>R</sup></i> | (1)            |
| pET15b                        | His6-Tag <i>Amp<sup>R</sup></i>                               | #69661-3 Merck |
| pGFP-C-Fus                    | <i>pMET25-GFP URA3 CEN</i>                                    | (2)            |
| pRRLSin-PGK-IRES-ZsGreen-WPRE | <i>pPGK-EGFP URA3 Amp<sup>R</sup></i>                         | #12252 Addgene |
| pFL44L                        | <i>2 μ URA3 Amp<sup>R</sup></i>                               | F. Lacroute    |
| YepLac195                     | <i>2 μ URA3 Amp<sup>R</sup></i>                               | (3)            |
| P4919                         | <i>URA6</i> in YepLac195                                      | This study     |
| P4979                         | <i>PAN3 URA6</i> in pFL44L                                    | This study     |
| P4983                         | <i>KAP123</i> in YepLac195                                    | This study     |
| P5055                         | <i>Myc-KAP123</i> in pCM189                                   | This study     |
| P5486                         | <i>URA6</i> in pRRLSin-PGK-IRES-ZsGreen-WPRE                  | This study     |
| P5653                         | <i>RPL25-NSL</i> in pGFP-C-Fus                                | This study     |

## References cited:

- (1) Garí E, Piedrafita L, Aldea M, Herrero E. (1997) A set of vectors with a tetracycline-regulatable promoter system for modulated gene expression in *Saccharomyces cerevisiae*. *Yeast*. **13**: 837–848.
- (2) Niedenthal RK, Riles L, Johnston M, Hegemann JH. (1996) Green fluorescent protein as a marker for gene expression and subcellular localization in budding yeast. *Yeast*. **12**(8):773-86.
- (3) Gietz RD, Sugino A. (1988) New yeast-*Escherichia coli* shuttle vectors constructed with *in vitro* mutagenized yeast genes lacking six-base pair restriction sites. *Gene*. **74**(2):527-34.



**Table S8: Mass spectrometry acquisition parameters**

|                                        | LTQ                     | LTQ-Orbitrap XL          | Q-Exactive       |
|----------------------------------------|-------------------------|--------------------------|------------------|
| MS mass range                          | 300-1700                | 300-1700                 | 300-2000         |
| MS resolution                          | -                       | 70000                    | 70000            |
| AGC target                             | $3 \cdot 10^4$ in 10 ms | $5 \cdot 10^5$ in 500 ms | $10^6$ in 100 ms |
| MS/MS strategy                         | TOP 3                   | TOP 6                    | TOP 15           |
| MS/MS mode                             | CID                     | CID                      | HCD              |
| MS/MS resolution                       | -                       | -                        | 35000            |
| MS <sup>2</sup> AGC target             | $10^4$ in 100 ms        | $10^4$ in 50 ms          | $10^5$ in 120 ms |
| Ion isolation window                   | 2 m/z                   | 3 m/z                    | 3 m/z            |
| Normalized collision energy            | 35                      | 35                       | 25               |
| Charge state selection                 | 2-4+                    | 2-3                      | 2-3              |
| Dynamix exclusion duration             | 20 s                    | 30 s                     | 30 s             |
| Sequest MS mass tolerance              | 1.4 Da                  | 10 ppm                   | 10 ppm           |
| Sequest MS <sup>2</sup> mass tolerance | 0.6 Da                  | 0.6 Da                   | 0.02 Da          |
